# Supplementary material
Source: publisher figshare collection journal article supplement (https://acs.figshare.com/ndownloader/files/4174183)
Supplement: Supplementary file 1 [file 4174183]

# SUPPORTING INFORMATION

## Synthesis and Discovery of *N*-Carbonylpyrrolidine- or *N*-Sulfonylpyrrolidine-containing Uracil Derivatives as Potent Human Deoxyuridine Triphosphatase Inhibitors

Hitoshi Miyakoshi,<sup>a,c</sup> Seiji Miyahara,<sup>a,b</sup> Tatsushi Yokogawa,<sup>a</sup> Khoon Tee Chong,<sup>a</sup> Junko Taguchi,<sup>a</sup> Kanji Endoh,<sup>a</sup> Wakako Yano,<sup>a</sup> Takeshi Wakasa,<sup>a</sup> Hiroyuki Ueno,<sup>a</sup> Yayoi Takao,<sup>a</sup> Makoto Nomura,<sup>a</sup> Satoshi Shuto,<sup>b</sup> Hideko Nagasawa,<sup>c</sup> and Masayoshi Fukuoka<sup>a</sup>

<sup>a</sup>Drug discovery research center, Taiho Pharmaceutical Co. Ltd., Okubo 3, Tsukuba, Ibaraki, 300-2611, Japan, <sup>b</sup>Faculty of Pharmaceutical Sciences, Hokkaido University, Kita-12, Nishi-6, Kita-ku, Sapporo 060-0812, Japan, <sup>c</sup>Laboratory of Medicinal and Pharmaceutical Chemistry, Gifu Pharmaceutical University, 1-25-4 Daigaku-nishi, Gifu 501-1196, Japan.

### Contents:

|                                                                                                                              |         |
|------------------------------------------------------------------------------------------------------------------------------|---------|
| Experimental section of Chemistry -----                                                                                      | S2-S32  |
| HPLC analysis chart of <b>11i</b> -----                                                                                      | S33     |
| HPLC analysis chart of <b>11r</b> -----                                                                                      | S34     |
| <sup>1</sup> H-NMR spectrum of <b>11s</b> in DMSO- <i>d</i> <sub>6</sub> at 25 °C and 80 °C -----                            | S34-S35 |
| Cloning, expression and purification of recombinant human dUTPase -----                                                      | S35     |
| Statistics for X-ray data processing and structure refinement for complex dUTPase:compound <b>16a</b> (PDB code: 3ARA) ----- | S35-S37 |
| Docking study of <b>16b</b> on the X-ray structure of human dUTPase and <b>16a</b> -----                                     | S37-S38 |
| reference -----                                                                                                              | S38-S39 |

## Experimental Section of chemistry

**General Methods and Materials.** All commercially available starting materials and solvents were reagent grade. Silica gel column chromatography was performed on Merck silica gel 60 (230-400 mesh).  $^1\text{H}$  NMR spectra were measured at 270 MHz on a JEOL JNM-EX270 or 400 MHz on a JEOL JNM-LA400.  $^{13}\text{C}$  NMR spectra were measured 100 MHz on a JEOL JNM-LA400. Chemical shifts were recorded in parts per million (ppm,  $\delta$ ) and were reported relative to the solvent peak or internal tetramethylsilane peak. High-resolution mass spectra (HRMS) were measured with JEOL JMS-700 (FAB) or Waters micromass Q-Tof-2 (TOF). Chemical purities of tested compounds were determined by combustion analysis or HPLC analysis and confirmed  $\geq 95\%$  purity. Combustion analyses (C, H, N) were performed on a Thermo electron Corp. Flash EA 1112 series, and values were within  $\pm 0.4\%$  of the theoretical values. Chemical purities of tested compounds **11i** and **11r** were determined by HPLC analysis with SHIMADZU Prominence HPLC system. Optical rotations were measured by HORIBA SEPA-200 polarimeter. Optical rotations were measured by HORIBA SEPA-200 polarimeter. The details of the experimental procedures of Method A-H were described in experimental section of the main manuscript.

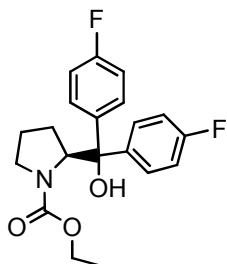

### **(S)-Ethyl 2-(bis(4-fluorophenyl)(hydroxy)methyl)pyrrolidine-1-carboxylate (7b)**

Compound **7b** (1.20 g, 66% as a colorless solid) was synthesized from **6a** (1.0 g, 5.0 mmol) and a THF solution of 4-fluorophenylmagnesium bromide (1.0 M, 20 mL, 20 mmol) according to the procedure described for Method A.  $^1\text{H}$  NMR ( $\text{CDCl}_3$ )  $\delta$  0.80-0.90 (1H, m), 1.25 (3H, t,  $J = 6.8$  Hz), 1.51-1.54 (1H, m), 1.83-1.90 (1H, m), 2.04-2.14 (1H, m), 2.93-3.00 (1H, m), 3.43 (1H, dd,  $J = 8.0$ , 18.0 Hz), 4.12-4.16 (2H, m), 4.85 (1H, dd,  $J = 4.0$ , 8.8 Hz), 6.09 (1H, brs), 6.96-7.03 (4H, m), 7.32-7.37 (4H, m); TOF-HRMS  $m/z$   $[\text{M}+\text{H}]^+$ : Calcd. for  $\text{C}_{20}\text{H}_{22}\text{F}_2\text{NO}_3$ , 362.1568; Found, 362.1570

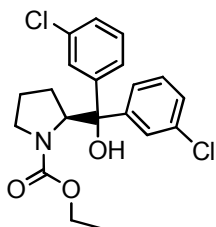

**(S)-Ethyl 2-(bis(3-chlorophenyl)(hydroxy)methyl)pyrrolidine-1-carboxylate (7c)**

Compound **7c** (480 mg, 81%, a colorless solid) was synthesized from **6a** (300 mg, 1.5 mmol) and a THF solution of 3-chlorophenylmagnesium bromide (0.5 M, 9.0 mL, 4.5 mmol) according to the procedure described for Method A.  $^1\text{H}$  NMR ( $\text{CDCl}_3$ )  $\delta$  0.90-1.00 (1H, m), 1.24 (3H, t,  $J = 7.0$  Hz), 1.51-1.64 (1H, m), 1.83-1.94 (1H, m), 2.02-2.13 (1H, m), 2.95-3.04 (1H, m), 3.42-3.52 (1H, m), 4.06-4.20 (2H, m), 4.82 (1H, dd,  $J = 4.3, 8.9$  Hz), 7.20-7.30 (6H, m), 7.38 (1H, s), 7.43 (1H, s); FAB-HRMS  $m/z$   $[\text{M}+\text{Na}]^+$ : Calcd. for  $\text{C}_{20}\text{H}_{21}\text{Cl}_2\text{NO}_3\text{Na}$ , 416.0796; Found, 416.0791

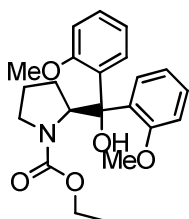

**(S)-Ethyl 2-(hydroxybis(2-methoxyphenyl)methyl)pyrrolidine-1-carboxylate (7d)**

Compound **7d** (1.41 g, 73%, a colorless solid) was synthesized from **6a** (1.0 g, 5.0 mmol) and a THF solution of 2-methoxyphenylmagnesium bromide (1.0 M, 20 mL, 20mmol) according to the procedure described for Method A.  $^1\text{H}$  NMR ( $\text{CDCl}_3$ )  $\delta$  0.94 (3H, brs), 1.72-1.83 (1H, m), 2.10-2.23 (3H, m), 3.42 (2H, brs), 3.45 (6H, s), 3.72-3.83 (2H, m), 4.95 (1H, brs), 5.28 (1H, brs), 6.70 (1H, d,  $J = 7.8$  Hz), 6.82 (1H, dd,  $J = 1.1, 8.1$  Hz), 6.89 (1H, t,  $J = 7.8$  Hz), 6.99 (1H, td,  $J = 1.1, 7.6$  Hz), 7.13 (1H, td,  $J = 1.9, 8.1$  Hz), 7.16-7.23 (1H, m), 7.54 (1H, d,  $J = 7.83$  Hz), 7.59 (1H, d,  $J = 7.6$  Hz); FAB-HRMS  $m/z$   $[\text{M}+\text{Na}]^+$ : Calcd. for  $\text{C}_{22}\text{H}_{27}\text{NO}_5\text{Na}$ , 408.1787; Found, 408.1783

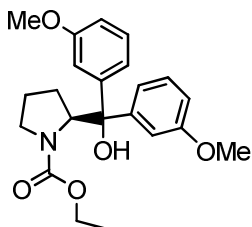

**(S)-Ethyl 2-(hydroxybis(3-methoxyphenyl)methyl)pyrrolidine-1-carboxylate (7e)**

Compound **7e** (1.25 g, 65%, a colorless gum) was synthesized from **6a** (1.0 g, 5.0 mmol) and a THF

solution of 3-methoxyphenylmagnesium bromide (1.0 M, 20 mL, 20mmol) according to the procedure described for Method A.  $^1\text{H}$  NMR ( $\text{CDCl}_3$ )  $\delta$  0.87-1.00 (1H, m), 1.22 (3H, t,  $J = 6.8$  Hz), 1.44-1.56 (1H, m), 1.91-2.15 (2H, m), 2.97-3.06 (1H, m), 3.39-3.51 (1H, m), 3.76 (3H, s), 3.78 (3H, s), 4.04-4.21 (2H, m), 4.87 (1H, dd,  $J = 3.8, 8.6$  Hz), 6.79-6.83 (2H, m), 6.90 (1H, d,  $J = 8.1$  Hz), 6.97-7.00 (2H, m), 7.04-7.05 (1H, m), 7.16-7.23 (2H, m); FAB-HRMS  $m/z$   $[\text{M}+\text{H}]^+$ : Calcd. for  $\text{C}_{22}\text{H}_{28}\text{NO}_5$ , 386.1967; Found, 386.1951

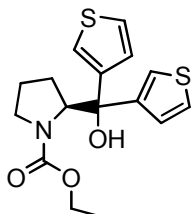

**(S)-Ethyl 2-(hydroxydithiophen-3-ylmethyl)pyrrolidine-1-carboxylate (7f)**

Compound **7f** (1.01 g, 60%, a colorless solid) was synthesized from **6a** (1.0 g, 5.0 mmol) and a THF solution of 3-thienylmagnesium iodide (0.3 M, 67 mL, 20 mmol) according to the procedure described for Method A.  $^1\text{H}$  NMR ( $\text{CDCl}_3$ )  $\delta$  1.09-1.20 (1H, m), 1.25 (3H, t,  $J = 7.0$  Hz), 1.51-1.64 (1H, m), 1.85-2.10 (2H, m), 2.92-2.95 (1H, m), 3.44-3.53 (1H, m), 4.12-4.21 (2H, m), 4.73 (1H, dd,  $J = 5.1, 8.6$  Hz), 7.08 (1H, dd,  $J = 1.4, 4.6$  Hz), 7.15-7.18 (2H, m), 7.21-7.30 (3H, m); FAB-HRMS  $m/z$   $[\text{M}+\text{Na}]^+$ : Calcd. for  $\text{C}_{16}\text{H}_{19}\text{NO}_3\text{S}_2\text{Na}$ , 360.0704; Found, 360.0689

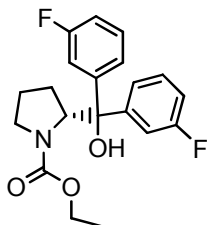

**(R)-Ethyl 2-(bis(3-fluorophenyl)(hydroxy)methyl)pyrrolidine-1-carboxylate (7g)**

Compound **7g** (4.23 g, 78%, a colorless solid) was synthesized from *N*-carboethoxy-D-proline methyl ester **6b** (3.0 g, 15 mmol) and a THF solution of 3-fluorophenylmagnesium bromide (1.0 M, 52 mL, 52 mmol) according to the procedure described for Method A.  $^1\text{H}$  NMR ( $\text{CDCl}_3$ )  $\delta$  0.89-1.00 (1H, m), 1.24 (3H, t,  $J = 7.0$  Hz), 1.49-1.63 (1H, m), 1.85-1.97 (1H, m), 2.05-2.13 (1H, m), 2.96-3.06 (1H, m), 3.46 (1H, dt,  $J = 7.8, 10.5$  Hz), 4.06-4.22 (2H, m), 4.83 (1H, dd,  $J = 4.1, 8.6$  Hz), 6.94-7.03 (2H, m), 7.08-7.33 (6H, m); FAB-HRMS  $m/z$   $[\text{M}-\text{H}]^-$ : Calcd. for  $\text{C}_{20}\text{H}_{20}\text{F}_2\text{NO}_3$ , 360.1411; Found, 360.1409

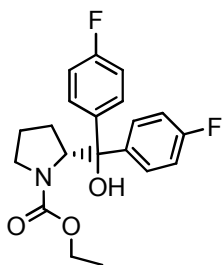

**(R)-Ethyl 2-(bis(4-fluorophenyl)(hydroxy)methyl)pyrrolidine-1-carboxylate (7h)**

Compound **7h** (3.74 g, 69%, a colorless solid) was synthesized from *N*-carboethoxy-D-proline methyl ester **6b** (3.0 g, 15 mmol) and a THF solution of 4-fluorophenylmagnesium bromide (1.0 M, 52 mL, 52 mmol) according to the procedure described for Method A.  $^1\text{H}$  NMR ( $\text{CDCl}_3$ )  $\delta$  0.79-0.90 (1H, m), 1.25 (3H, t,  $J = 7.3$  Hz), 1.45-1.57 (1H, m), 1.81-1.92 (1H, m), 2.01-2.16 (1H, m), 2.91-3.00 (1H, m), 3.43 (1H, dd,  $J = 7.8, 18.6$  Hz), 4.09-4.22 (2H, m), 4.85 (1H, dd,  $J = 3.8, 8.6$  Hz), 6.09 (1H, brs), 6.95-7.05 (4H, m), 7.30-7.37 (4H, m); FAB-HRMS  $m/z$   $[\text{M}+\text{H}]^+$ : Calcd. for  $\text{C}_{20}\text{H}_{22}\text{F}_2\text{NO}_3$ , 362.1568; Found, 362.1561

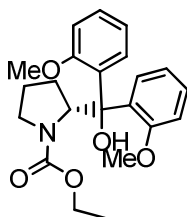

**(R)-Ethyl 2-(hydroxybis(2-methoxyphenyl)methyl)pyrrolidine-1-carboxylate (7i)**

Compound **7i** (4.57 g, 79%, a colorless solid) was synthesized from *N*-carboethoxy-D-proline methyl ester **6b** (3.0 g, 15 mmol) and a THF solution of 2-methoxyphenylmagnesium bromide (1.0 M, 45 mL, 45 mmol) according to the procedure described for Method A.  $^1\text{H}$  NMR ( $\text{CDCl}_3$ )  $\delta$  0.86-1.22 (4H, m), 1.72-1.83 (1H, m), 2.05-2.25 (2H, m), 3.42 (2H, brs), 3.49 (6H, s), 3.70-3.82 (2H, m), 4.95 (1H, brs), 5.29 (1H, brs), 6.70 (1H, d,  $J = 8.1$  Hz), 6.82 (1H, d,  $J = 8.4$  Hz), 6.89 (1H, t,  $J = 7.6$  Hz), 6.99 (1H, td,  $J = 1.1, 7.6$  Hz), 7.13 (1H, td,  $J = 1.6, 7.6$  Hz), 7.20 (1H, td,  $J = 1.6, 7.8$  Hz), 7.54 (1H, d,  $J = 6.8$  Hz), 7.60 (1H, d,  $J = 8.1$  Hz); FAB-HRMS  $m/z$   $[\text{M}+\text{H}]^+$ : Calcd. for  $\text{C}_{22}\text{H}_{28}\text{NO}_5$ , 386.1967; Found, 386.1968

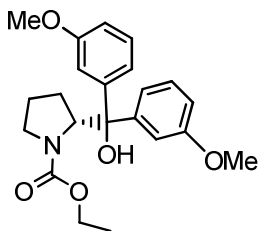

**(R)-Ethyl 2-(hydroxybis(3-methoxyphenyl)methyl)pyrrolidine-1-carboxylate (7j)**

Compound **7j** (925 mg, 80%, a colorless gum) was synthesized from *N*-carboethoxy-D-proline methyl ester **6b** (600 mg, 3.0 mmol) and a THF solution of 3-methoxyphenylmagnesium bromide (1.0 M, 9 mL, 9.0 mmol) according to the procedure described for Method A. <sup>1</sup>H NMR (CDCl<sub>3</sub>) δ 0.89-0.98 (1H, m), 1.22 (3H, t, *J* = 7.0 Hz), 1.44-1.55 (1H, m), 1.91-2.15 (2H, m), 2.97-3.06 (1H, m), 3.39-3.51 (1H, m), 3.76 (3H, s), 3.78 (3H, s), 4.04-4.21 (2H, m), 4.87 (1H, dd, *J* = 4.1, 8.6 Hz), 6.79-6.80 (1H, m), 6.83 (1H, t, *J* = 2.2 Hz), 6.90 (1H, d, *J* = 7.8 Hz), 6.97-7.00 (2H, m), 7.04 (1H, t, *J* = 2.2 Hz), 7.16-7.23 (2H, m); FAB-HRMS *m/z* [M+Na]<sup>+</sup>: Calcd. for C<sub>22</sub>H<sub>27</sub>NO<sub>5</sub>Na, 408.1787; Found, 408.1807

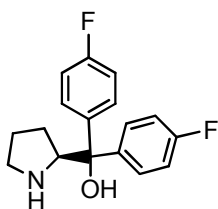

**(S)-Bis(4-Fluorophenyl)(pyrrolidin-2-yl)methanol (8b)**

Potassium hydroxide (1.85 g, 33mmol) was added to a solution of **7b** (1.2 g, 3.3 mmol) in MeOH (10 mL). The mixture was heated to reflux for 12 hr. The mixture was evaporated to give a residue, which was dissolved in water (10 mL), followed by extraction with CHCl<sub>3</sub> (20 mL). The organic phase was washed with water (10 mL) and brine (10 mL), dried (K<sub>2</sub>CO<sub>3</sub>), and concentrated *in vacuo*. The residue was purified by silica gel column chromatography (10-20% MeOH in CHCl<sub>3</sub>) to give **8b** (907 mg, 95% as a colorless solid). <sup>1</sup>H NMR (CDCl<sub>3</sub>) δ 1.49-1.62 (2H, m), 1.64-1.79 (2H, m), 2.93-3.06 (2H, m), 4.17 (1H, t, *J* = 7.6 Hz), 6.93-7.00 (4H, m), 7.40-7.45 (2H, m), 7.47-7.52 (2H, m); TOF-HR MS *m/z* [M+H]<sup>+</sup>: Calcd. for C<sub>17</sub>H<sub>18</sub>F<sub>2</sub>NO, 290.1356; Found, 290.1360; [α]<sub>D</sub><sup>25</sup> = -48.42 (*c* 0.38, MeOH), reference data<sup>1</sup> [α]<sub>D</sub><sup>22</sup> = -48.5 (*c* 0.32, MeOH)

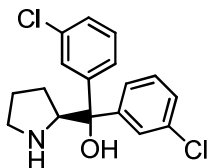

**(S)-Bis(3-chlorophenyl)(pyrrolidin-2-yl)methanol (8c)**

Compound **8c** (370 mg, 94%, a colorless gum) was synthesized from **7c** (480 mg, 1.2 mmol) according to the procedure described for Method B. <sup>1</sup>H NMR (DMSO-*d*<sub>6</sub>) δ 1.36-1.43 (2H, m), 1.51-1.58 (2H, m), 2.35 (1H, brs), 2.80 (2H, t, *J* = 1.9 Hz), 4.23 (1H, t, *J* = 7.6 Hz), 5.42 (1H, brs), 7.19-7.44 (6H, m), 7.50-7.59 (2H, m); FAB-HRMS *m/z* [M+H]<sup>+</sup>: Calcd. for C<sub>17</sub>H<sub>18</sub>Cl<sub>2</sub>NO, 322.0765; Found, 322.0749

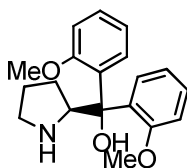

**(S)-Bis(2-methoxyphenyl)(pyrrolidin-2-yl)methanol (8d)**

Compound **8d** (1.07 g, 92%, a colorless solid) was synthesized from **7d** (1.41 g, 3.7 mmol) according to the procedure described for Method B.  $^1\text{H}$  NMR ( $\text{DMSO}-d_6$ )  $\delta$  1.14-1.26 (1H, m), 1.32-1.42 (1H, m), 1.47-1.61 (2H, m), 2.24 (1H, brs), 2.75-2.92 (2H, m), 3.37 (3H, s), 3.46 (3H, s), 4.50 (1H, t,  $J = 7.6$  Hz), 5.14 (1H, brs), 6.77-6.95 (4H, m), 7.10-7.16 (2H, m), 7.58 (1H, dd,  $J = 1.6$ , 7.6 Hz), 7.71 (1H, dd,  $J = 1.9$ , 7.8 Hz); FAB-HRMS  $m/z$   $[\text{M}+\text{H}]^+$ : Calcd. for  $\text{C}_{19}\text{H}_{24}\text{NO}_3$ , 314.1756; Found, 314.1766

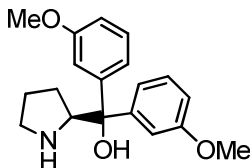

**(S)-Bis(3-methoxyphenyl)(pyrrolidin-2-yl)methanol (8e)**

Compound **8e** (917 mg, 90%, a colorless gum) was synthesized from **7e** (1.25 g, 3.3 mmol) according to the procedure described for Method B.  $^1\text{H}$  NMR ( $\text{DMSO}-d_6$ )  $\delta$  1.37-1.45 (2H, m), 1.53-1.62 (2H, m), 2.25 (1H, brs), 2.75-2.90 (2H, m), 3.70 (3H, s), 3.71 (3H, s), 4.22 (1H, d,  $J = 7.3$  Hz), 5.04 (1H, brs), 6.68-6.73 (2H, m), 7.00-7.04 (2H, m), 7.12-7.20 (4H, m); FAB-HRMS  $m/z$   $[\text{M}+\text{H}]^+$ : Calcd. for  $\text{C}_{19}\text{H}_{24}\text{NO}_3$ , 314.1756; Found, 314.1741

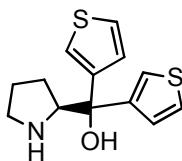

**(S)-Pyrrolidin-2-ylthiophen-3-ylmethanol (8f)**

Compound **8f** (676 mg, 85%, a colorless solid) was synthesized from **7f** (1.01 g, 3.0 mmol) according to the procedure described for Method B.  $^1\text{H}$  NMR ( $\text{DMSO}-d_6$ )  $\delta$  1.43-1.56 (4H, m), 2.80 (2H, t,  $J = 4.6$  Hz), 3.98 (1H, t,  $J = 7.6$  Hz), 7.07 (1H, d,  $J = 4.9$  Hz), 7.14 (1H, d,  $J = 4.9$  Hz), 7.31-7.38 (4H, m); FAB-HRMS  $m/z$   $[\text{M}+\text{H}]^+$ : Calcd. for  $\text{C}_{13}\text{H}_{16}\text{NOS}_2$ , 266.0673; Found, 266.0657

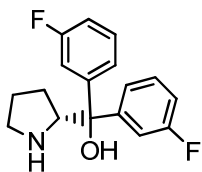

**(R)-Bis(3-fluorophenyl)(pyrrolidin-2-yl)methanol (8g)**

Compound **8g** (721 mg, 90%, a colorless gum) was synthesized from **7g** (1.0 g, 2.77 mmol) according to the procedure described for Method B.  $^1\text{H}$  NMR ( $\text{DMSO-}d_6$ )  $\delta$  1.36-1.45 (2H, m), 1.53-1.62 (2H, m), 2.38 (1H, brs), 2.75-2.88 (2H, m), 4.26 (1H, t,  $J = 7.6$  Hz), 5.34 (1H, brs), 6.94-7.02 (2H, m), 7.28-7.43 (6H, m); FAB-HRMS  $m/z$   $[\text{M}+\text{H}]^+$ : Calcd. for  $\text{C}_{17}\text{H}_{18}\text{F}_2\text{NO}$ , 290.1356; Found, 290.1385

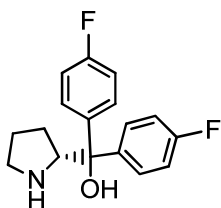

**(R)-Bis(4-fluorophenyl)(pyrrolidin-2-yl)methanol (8h)**

Compound **8h** (721 mg, 92%, a colorless solid) was synthesized from **7h** (1.0 g, 2.77 mmol) according to the procedure described for Method B.  $^1\text{H}$  NMR ( $\text{DMSO-}d_6$ )  $\delta$  1.38 (2H, q,  $J = 7.6$  Hz), 1.55 (2H, quint,  $J = 6.8$  Hz), 2.23 (1H, brs), 2.80 (2H, m), 4.18 (1H, t,  $J = 7.6$  Hz), 5.22 (1H, brs), 7.02-7.10 (4H, m), 7.41-7.48 (2H, m), 7.52-7.60 (2H, m); FAB-HRMS  $m/z$   $[\text{M}+\text{H}]^+$ : Calcd. for  $\text{C}_{17}\text{H}_{18}\text{F}_2\text{NO}$ , 290.1356; Found, 290.1358

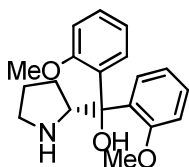

**(R)-Bis(2-methoxyphenyl)(pyrrolidin-2-yl)methanol (8i)**

Compound **8i** (3.2 g, 86%, a colorless solid) was synthesized from **7i** (4.57 g, 11.9 mmol) according to the procedure described for Method B.  $^1\text{H}$  NMR ( $\text{DMSO-}d_6$ )  $\delta$  1.14-1.26 (1H, m), 1.32-1.45 (1H, m), 1.49-1.59 (2H, m), 2.24 (1H, brs), 2.75-2.92 (2H, m), 3.37 (3H, s), 3.46 (3H, s), 4.50 (1H, t,  $J = 7.8$  Hz), 5.13 (1H, brs), 6.77-6.95 (4H, m), 7.13 (2H, tt,  $J = 1.6, 8.9$  Hz), 7.58 (1H, dd,  $J = 1.9, 7.8$  Hz), 7.70 (1H, dd,  $J = 1.9, 7.8$  Hz); FAB-HRMS  $m/z$   $[\text{M}+\text{H}]^+$ : Calcd. for  $\text{C}_{19}\text{H}_{24}\text{NO}_3$ , 314.1756; Found, 314.1780



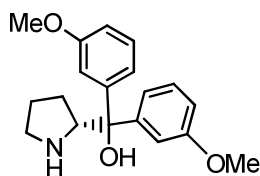

**(*R*)-Bis(3-methoxyphenyl)(pyrrolidin-2-yl)methanol (8j)**

Compound **8j** (730 mg, 97%, a colorless gum) was synthesized from **7j** (925 mg, 2.40 mmol) according to the procedure described for Method B.  $^1\text{H}$  NMR ( $\text{DMSO}-d_6$ )  $\delta$  1.41 (2H, q,  $J = 8.0$  Hz), 1.58 (2H, quint,  $J = 8.0$  Hz), 2.28 (1H, brs), 2.77-2.88 (2H, m), 3.70 (3H, s), 3.71 (3H, s), 4.22 (1H, t,  $J = 8.0$  Hz), 5.04 (1H, brs), 6.68-6.73 (2H, m), 7.00-7.04 (2H, m), 7.12-7.19 (4H, m); FAB-HRMS  $m/z$   $[\text{M}+\text{H}]^+$ : Calcd. for  $\text{C}_{19}\text{H}_{24}\text{NO}_3$ , 314.1756; Found, 314.1738

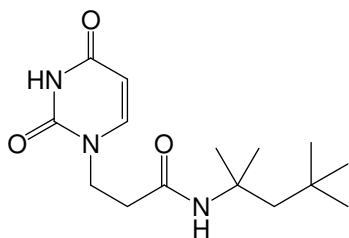

**3-(2,4-Dioxo-3,4-dihydropyrimidin-1(2*H*)-yl)-*N*-(2,4,4-trimethylpentan-2-yl)propanamide (11a)**

Compound **11a** (48 mg, 81%, a colorless solid) was synthesized from 3-(2,4-dioxo-3,4-dihydropyrimidin-1(2*H*)-yl)propanoic acid **9**<sup>2</sup> (37 mg, 0.20 mmol) and *tert*-octylamine (66  $\mu\text{L}$ , 0.40 mmol) according to the procedure described for Method C.  $^1\text{H}$  NMR ( $\text{CDCl}_3$ )  $\delta$  0.95 (9H, s), 1.36 (6H, s), 1.71 (2H, s), 2.53 (2H, t,  $J = 5.8$  Hz), 4.00 (2H, t,  $J = 5.6$  Hz), 5.29 (1H, brs), 5.62 (1H, dd,  $J = 2.3, 7.9$  Hz), 7.43 (1H, d,  $J = 7.8$  Hz), 8.18 (1H, brs);  $^{13}\text{C}$  NMR ( $\text{DMSO}-d_6$ )  $\delta$  29.32, 31.03, 31.21, 34.73, 44.80, 49.49, 53.75, 100.17, 146.57, 150.78, 163.77, 168.72; Anal. Calcd for  $\text{C}_{15}\text{H}_{25}\text{N}_3\text{O}_3$ : C, 60.99; H, 8.53; N, 14.23. Found: C, 61.33; H, 8.65; N, 14.23

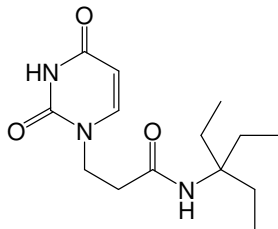

**3-(2,4-Dioxo-3,4-dihydropyrimidin-1(2*H*)-yl)-*N*-(3-ethylpentan-3-yl)propanamide (11b)**

A mixture of **9** (2.39 g, 13 mmol), 3-ethylpentane-3-amine hydrochloride<sup>3</sup> (3.85 g, 26 mmol), EDC·HCl (3.74 g, 19.5 mmol), triethylamine (2.7 mL, 19.5 mmol) and HOBT (2.28 g, 16.9 mmol) in DMF (30 mL) was stirred at room temperature for 3 hr. The reaction mixture was evaporated and the

residue was purified by silica gel column chromatography (1-3% MeOH in CHCl<sub>3</sub>) to give **11b** (2.8 g, 77% as a colorless solid). <sup>1</sup>H NMR (CDCl<sub>3</sub>) δ 0.72 (9H, t, *J* = 7.3 Hz), 1.63 (6H, q, *J* = 7.6 Hz), 2.60 (2H, t, *J* = 6.2 Hz), 4.02 (2H, t, *J* = 5.9 Hz), 4.99 (1H, brs), 5.62 (1H, d, *J* = 8.1 Hz), 7.40 (1H, d, *J* = 8.1 Hz), 8.80 (1H, brs); <sup>13</sup>C NMR (DMSO-*d*<sub>6</sub>) δ 7.27, 25.46, 34.49, 44.86, 58.58, 100.22, 146.346, 150.76, 163.77, 168.67; Anal. Calcd for C<sub>14</sub>H<sub>23</sub>N<sub>3</sub>O<sub>3</sub>: C, 59.77; H, 8.24; N, 14.94. Found: C, 60.00; H, 8.36; N, 15.00

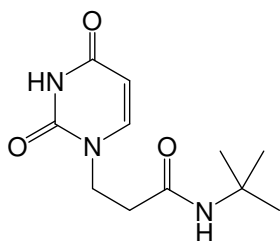

***N*-tert-Butyl-3-(2,4-dioxo-3,4-dihydropyrimidin-1(2*H*)-yl)propanamide (11c)**

Compound **11c** (41 mg, quant., a colorless solid) was synthesized from **9** (27 mg, 0.15 mmol) and *tert*-butylamine (30 μL, 0.30 mmol) according to the procedure described for Method C. <sup>1</sup>H NMR (CDCl<sub>3</sub>) δ 1.32 (9H, s), 2.54 (2H, t, *J* = 5.8 Hz), 4.02 (2H, t, *J* = 5.6 Hz), 5.57 (1H, d, *J* = 7.7 Hz), 6.26 (1H, brs), 7.40 (1H, d, *J* = 7.9 Hz), 7.7 (1H, brs); <sup>13</sup>C NMR (DMSO-*d*<sub>6</sub>) δ 28.43, 34.93, 44.82, 50.04, 100.28, 146.22, 150.77, 163.81, 169.00; Anal. Calcd for C<sub>11</sub>H<sub>17</sub>N<sub>3</sub>O<sub>3</sub>: C, 55.22; H, 7.16; N, 17.56. Found: C, 55.20; H, 7.25; N, 17.43

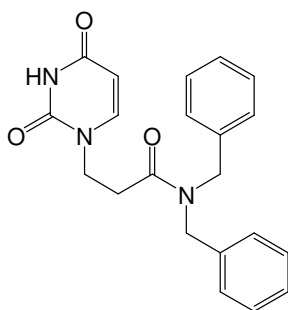

***N,N*-Dibenzyl-3-(2,4-dioxo-3,4-dihydropyrimidin-1(2*H*)-yl)propanamide (11d)**

Compound **11d** (55 mg, 56%, a colorless solid) was synthesized from **9** (50 mg, 0.27 mmol) and dibenzylamine (62 μL, 0.33 mmol) according to the procedure described for Method C. <sup>1</sup>H NMR (DMSO-*d*<sub>6</sub>) δ 2.81 (2H, t, *J* = 6.6 Hz), 3.94 (2H, t, *J* = 6.6 Hz), 4.50 (4H, d, *J* = 5.0 Hz), 5.52 (1H, d, *J* = 7.9 Hz), 7.13-7.38 (10H, m), 7.65 (1H, d, *J* = 7.9 Hz), 11.21 (1H, brs); <sup>13</sup>C NMR (DMSO-*d*<sub>6</sub>) δ 31.34, 44.73, 48.01, 49.78, 100.41, 126.41, 127.08, 127.31, 127.62, 128.40, 128.70, 136.89, 137.46, 146.44, 150.85, 163.78, 170.53; Anal. Calcd for C<sub>21</sub>H<sub>21</sub>N<sub>3</sub>O<sub>3</sub>: C, 69.41; H, 5.82; N, 11.56. Found: C, 69.48; H, 5.77; N, 11.55

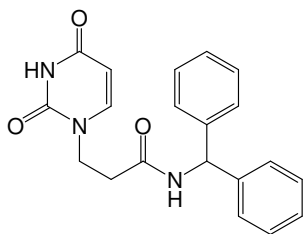

***N*-Benzhydryl-3-(2,4-dioxo-3,4-dihydropyrimidin-1(2*H*)-yl)propanamide (11e)**

Compound **11e** (60 mg, 63%, a colorless solid) was synthesized from **9** (50 mg, 0.27 mmol) and benzhydrylamine (60  $\mu$ L, 0.35 mmol) according to the procedure described for Method C.  $^1\text{H}$  NMR (DMSO- $d_6$ )  $\delta$  2.61 (2H, t,  $J$  = 6.8 Hz), 3.88 (2H, t,  $J$  = 6.2 Hz), 5.44 (1H, d,  $J$  = 8.1 Hz), 6.11 (1H, d,  $J$  = 8.4 Hz), 7.16-7.34 (10H, m), 7.46 (1H, d,  $J$  = 7.6 Hz), 8.92 (1H, d,  $J$  = 8.6 Hz), 11.24 (1H, brs);  $^{13}\text{C}$  NMR (DMSO- $d_6$ )  $\delta$  34.05, 44.78, 55.82, 100.44, 126.91, 127.23, 128.29, 142.19, 146.12, 150.76, 163.74, 168.86; Anal. Calcd for  $\text{C}_{20}\text{H}_{19}\text{N}_3\text{O}_3 \cdot 0.2\text{H}_2\text{O}$ : C, 68.05; H, 5.54; N, 11.90. Found: C, 68.24; H, 5.55; N, 11.92

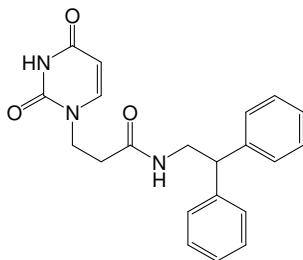

**3-(2,4-Dioxo-3,4-dihydropyrimidin-1(2*H*)-yl)-*N*-(2,2-diphenylethyl)propanamide (11f)**

Compound **11f** (63 mg, 63%, a colorless solid) was synthesized from **9** (50 mg, 0.27 mmol) and 2,2-diphenylethylamine (69 mg, 0.35 mmol) according to the procedure described for Method C.  $^1\text{H}$  NMR (DMSO- $d_6$ )  $\delta$  2.36 (2H, t,  $J$  = 6.5 Hz), 3.65-3.70 (2H, m), 3.78 (2H, t,  $J$  = 6.8 Hz), 4.13 (1H, t,  $J$  = 8.1 Hz), 5.49 (1H, d,  $J$  = 7.8 Hz), 7.14-7.30 (10H, m), 7.43 (1H, d,  $J$  = 7.8 Hz), 8.05 (1H, t,  $J$  = 5.4 Hz), 11.19 (1H, brs);  $^{13}\text{C}$  NMR (DMSO- $d_6$ )  $\delta$  33.96, 43.23, 44.74, 50.01, 100.45, 126.31, 127.81, 128.39, 142.82, 146.17, 150.72, 163.80, 169.63; Anal. Calcd for  $\text{C}_{21}\text{H}_{21}\text{N}_3\text{O}_3$ : C, 69.41; H, 5.82; N, 11.56. Found: C, 69.41; H, 5.72; N, 11.63

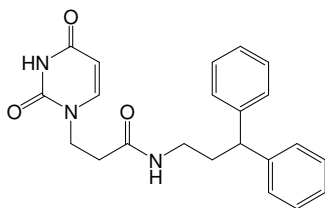

**3-(2,4-Dioxo-3,4-dihydropyrimidin-1(2H)-yl)-N-(3,3-diphenylpropyl)propanamide (11g)**

Compound **11g** (70 mg, 67%, a colorless solid) was synthesized from **9** (50 mg, 0.27 mmol) and 3,3-diphenylpropylamine (74 mg, 0.35 mmol) according to the procedure described for Method C.  $^1\text{H}$  NMR (DMSO- $d_6$ )  $\delta$  2.24 (2H, q,  $J$  = 7.6 Hz), 2.48 (2H, t,  $J$  = 5.4 Hz), 3.21 (2H, q,  $J$  = 6.5 Hz), 3.88-3.99 (3H, m), 5.55 (1H, d,  $J$  = 7.8 Hz), 5.72 (1H, t,  $J$  = 5.9 Hz), 7.14-7.30 (10H, m), 7.36 (1H, d,  $J$  = 7.8 Hz), 9.07 (1H, brs);  $^{13}\text{C}$  NMR (DMSO- $d_6$ )  $\delta$  34.10, 34.42, 37.29, 44.77, 47.83, 100.37, 126.06, 127.54, 128.38, 144.64, 146.18, 150.76, 163.75, 169.33; Anal. Calcd for  $\text{C}_{22}\text{H}_{23}\text{N}_3\text{O}_3$ : C, 70.01; H, 6.14; N, 11.13. Found: C, 69.82; H, 6.19; N, 11.03

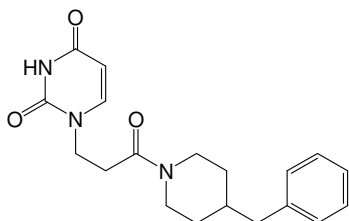

**1-(3-(4-Benzylpiperidin-1-yl)-3-oxopropyl)pyrimidine-2,4(1H,3H)-dione (11h)**

Compound **11h** (55 mg, 60%, a colorless solid) was synthesized from **9** (50 mg, 0.27 mmol) and 4-benzylpiperidine (62  $\mu\text{L}$ , 0.35 mmol) according to the procedure described for Method C.  $^1\text{H}$  NMR ( $\text{CDCl}_3$ )  $\delta$  1.04-1.19 (2H, m), 1.68-1.80 (3H, m), 2.46-2.56 (3H, m), 2.75 (2H, t,  $J$  = 5.4 Hz), 2.88-2.98 (1H, m), 3.71-3.78 (1H, m), 4.04 (2H, t,  $J$  = 5.4 Hz), 4.51-4.56 (1H, m), 5.63 (1H, dd,  $J$  = 2.2, 7.8 Hz), 7.11-7.31 (5H, m), 7.59 (1H, d,  $J$  = 8.1 Hz), 8.14 (1H, brs);  $^{13}\text{C}$  NMR (DMSO- $d_6$ )  $\delta$  31.34, 32.00, 37.28, 41.11, 42.06, 44.72, 44.86, 100.39, 125.83, 128.16, 128.99, 140.00, 146.47, 150.90, 163.80, 167.96; Anal. Calcd for  $\text{C}_{19}\text{H}_{23}\text{N}_3\text{O}_3$ : C, 66.84; H, 6.79; N, 12.31. Found: C, 67.01; H, 6.85; N, 12.33

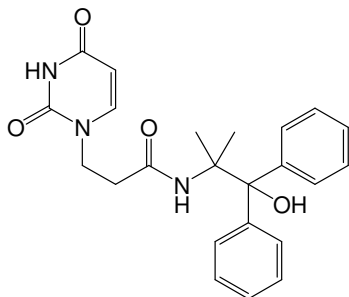

**3-(2,4-Dioxo-3,4-dihydropyrimidin-1(2H)-yl)-N-(1-hydroxy-2-methyl-1,1-diphenylpropan-2-yl)propanamide (11i)**

Compound **11i** (53 mg, 30%, a colorless solid) was synthesized from **9** (80 mg, 0.43 mmol) and 2-amino-2-methyl-1,1-diphenylpropan-1-ol<sup>4</sup> (195 mg, 0.80 mmol) according to the procedure described for Method C.  $^1\text{H}$  NMR (DMSO- $d_6$ )  $\delta$  1.27 (6H, s), 2.37 (2H, t,  $J$  = 6.5 Hz), 3.61 (2H, t,  $J$

= 6.5 Hz), 5.35 (1H, d,  $J$  = 7.6 Hz), 7.12 -7.44 (12H, m), 8.43 (1H, s), 11.17 (1H, brs);  $^{13}\text{C}$  NMR (DMSO- $d_6$ )  $\delta$  34.40, 44.67, 61.43, 81.65, 100.45, 126.42, 126.91, 128.16, 145.84, 150.66, 163.71, 170.99; TOF-HRMS  $m/z$   $[\text{M}+\text{H}]^+$ : Calcd. for  $\text{C}_{23}\text{H}_{26}\text{N}_3\text{O}_4$ , 408.1923; Found, 408.1917; Purity: 98.54% (Column: Shim-pack XR-ODS 3 mmID $\times$ 50 mm, 2.2  $\mu\text{m}$ , Column temperature: 40  $^\circ\text{C}$ , Mobile phase: 10 mM Phosphate buffred solution pH 6.5 /Acetonitrile :0 min 90/10, 8 min 20/80, 10 min 20/80, Flow rate : 0.8 mL/min, **11i** was eluted at 5.4 min)

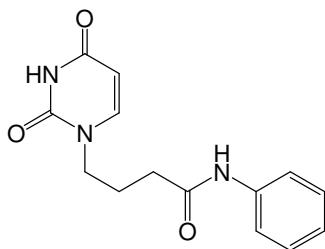

#### 4-(2,4-Dioxo-3,4-dihydropyrimidin-1(2H)-yl)-N-phenylbutanamide (**11j**)

Compound **11j** (169 mg, 76%, a colorless solid) was synthesized from **10** (161 mg, 0.81 mmol) and aniline (311 mg, 3.24 mmol) according to the procedure described for Method C.  $^1\text{H}$  NMR (DMSO- $d_6$ )  $\delta$  1.84-1.94 (2H, m), 2.32 (2H, t,  $J$  = 7.6 Hz), 3.71 (2H, t,  $J$  = 7.0 Hz), 5.54 (1H, d,  $J$  = 7.6 Hz), 7.01 (1H, t,  $J$  = 7.6 Hz), 7.27 (2H, t,  $J$  = 8.4 Hz), 7.55 (2H, d,  $J$  = 8.1 Hz), 7.63 (1H, d,  $J$  = 7.8 Hz), 9.88 (1H, brs), 11.20 (1H, brs);  $^{13}\text{C}$  NMR (DMSO- $d_6$ )  $\delta$  24.37, 33.08, 47.05, 100.94, 119.12, 123.05, 128.65, 139.20, 145.65, 151.02, 163.79, 170.29; Anal. Calcd for  $\text{C}_{14}\text{H}_{15}\text{N}_3\text{O}_3$ : C, 61.53; H, 5.53; N, 15.38. Found: C, 61.31; H, 5.50; N, 15.26

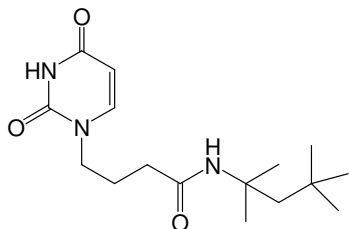

#### 4-(2,4-Dioxo-3,4-dihydropyrimidin-1(2H)-yl)-N-(2,4,4-trimethylpentan-2-yl)butanamide (**11k**)

Compound **11k** (51 mg, 20%, a colorless solid) was synthesized from **10** (161 mg, 0.81 mmol) and *tert*-octylamine (520  $\mu\text{L}$ , 3.24 mmol) according to the procedure described for Method C.  $^1\text{H}$  NMR (DMSO- $d_6$ )  $\delta$  0.91 (9H, s), 1.25 (6H, s), 1.68 (2H, s), 1.71-1.79 (2H, m), 2.00 (2H, t,  $J$  = 8.1 Hz), 3.63 (2H, t,  $J$  = 7.3 Hz), 5.52 (1H, d,  $J$  = 7.8 Hz), 7.28 (1H, brs), 7.59 (1H, d,  $J$  = 7.6 Hz), 11.18 (1H, brs);  $^{13}\text{C}$  NMR (DMSO- $d_6$ )  $\delta$  24.64, 29.27, 31.43, 31.63, 33.41, 47.78, 51.32, 55.31, 102.32, 144.75, 151.16, 163.63, 170.44; Anal. Calcd for  $\text{C}_{16}\text{H}_{27}\text{N}_3\text{O}_3$ : C, 62.11; H, 8.80; N, 13.58. Found: C, 62.15; H, 8.89; N, 13.44

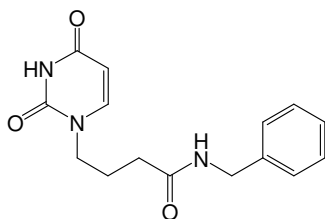

***N*-Benzyl-4-(2,4-dioxo-3,4-dihydropyrimidin-1(2*H*)-yl)butanamide (11l)**

Compound **11l** (92 mg, 39%, a colorless solid) was synthesized from **10** (161 mg, 0.81 mmol) and benzylamine (354  $\mu$ L, 3.24 mmol) according to the procedure described for Method C.  $^1\text{H}$  NMR ( $\text{DMSO-}d_6$ )  $\delta$  1.77-1.88 (2H, m), 2.15 (2H, t,  $J$  = 7.8 Hz), 3.66 (2H, t,  $J$  = 7.0 Hz), 4.24 (2H, d,  $J$  = 5.9 Hz), 5.52 (1H, d,  $J$  = 7.8 Hz), 7.19-7.34 (5H, m), 7.59 (1H,  $J$  = 7.8 Hz), 8.33 (1H, t,  $J$  = 5.4 Hz), 11.19 (1H, brs);  $^{13}\text{C}$  NMR ( $\text{DMSO-}d_6$ )  $\delta$  24.67, 32.05, 42.03, 47.14, 100.82, 126.69, 127.19, 128.25, 139.50, 145.64, 150.93, 163.72, 171.18; Anal. Calcd for  $\text{C}_{15}\text{H}_{17}\text{N}_3\text{O}_3$ : C, 62.71; H, 5.96; N, 14.63. Found: C, 62.91; H, 6.03; N, 14.42

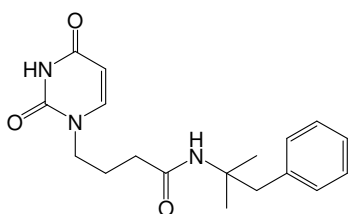

**4-(2,4-Dioxo-3,4-dihydropyrimidin-1(2*H*)-yl)-*N*-(2-methyl-1-phenylpropan-2-yl)butanamide (11m)**

Compound **11m** (155 mg, quant., a colorless solid) was synthesized from **10** (92 mg, 0.46 mmol) and phentermine (148  $\mu$ L, 0.92 mmol) according to the procedure described for Method C.  $^1\text{H}$  NMR ( $\text{DMSO-}d_6$ )  $\delta$  1.17 (6H, s), 1.74-1.85 (2H, m), 2.02 (2H, t,  $J$  = 8.1 Hz), 2.96 (2H, s), 3.66 (2H, t,  $J$  = 6.8 Hz), 5.53 (1H, d,  $J$  = 7.8 Hz), 7.06-7.09 (2H, m), 7.15-7.28 (4H, m), 7.60 (1H, d,  $J$  = 7.6 Hz), 11.19 (1H, brs);  $^{13}\text{C}$  NMR ( $\text{CDCl}_3$ )  $\delta$  24.82, 27.36, 33.29, 44.78, 47.78, 54.23, 102.37, 126.43, 128.01, 130.47, 137.95, 144.75, 151.24, 163.78, 171.12; Anal. Calcd for  $\text{C}_{18}\text{H}_{23}\text{N}_3\text{O}_3$ : C, 65.63; H, 7.04; N, 12.76. Found: C, 65.60; H, 7.09; N, 12.56

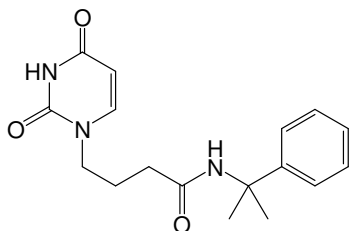

**4-(2,4-Dioxo-3,4-dihydropyrimidin-1(2H)-yl)-N-(2-phenylpropan-2-yl)butanamide (11n)**

Compound **11n** (152 mg, quant., a colorless solid) was synthesized from **10** (92 mg, 0.46 mmol) and cumylamine (132  $\mu$ L, 0.92 mmol) according to the procedure described for Method C.  $^1\text{H}$  NMR ( $\text{DMSO-}d_6$ )  $\delta$  1.51 (6H, s), 1.70-1.81 (2H, m), 2.12 (2H, t,  $J = 7.8$  Hz), 3.63 (2H, t,  $J = 6.8$  Hz), 5.53 (1H, d,  $J = 7.8$  Hz), 7.10-7.31 (5H, m), 7.57 (1H, d,  $J = 7.6$  Hz), 8.02 (1H, brs), 11.20 (1H, brs);  $^{13}\text{C}$  NMR ( $\text{DMSO-}d_6$ )  $\delta$  24.67, 29.44, 32.58, 47.10, 54.62, 100.86, 124.63, 125.66, 127.84, 145.62, 147.91, 150.95, 163.74, 170.37; Anal. Calcd for  $\text{C}_{17}\text{H}_{21}\text{N}_3\text{O}_3$ : C, 64.74; H, 6.71; N, 13.32. Found: C, 64.56; H, 6.82; N, 13.25

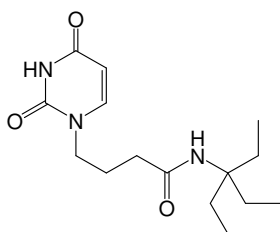

**4-(2,4-Dioxo-3,4-dihydropyrimidin-1(2H)-yl)-N-(3-ethylpentan-3-yl)butanamide (11o)**

Compound **11o** (12 mg, 24% as a colorless solid) was synthesized from (34 mg, 0.17 mmol) and 3-ethylpentane-3-amine hydrochloride<sup>3</sup> (60 mg, 0.34 mmol) according to the procedure described for the conversion of **9** to **11b**.  $^1\text{H}$  NMR ( $\text{CDCl}_3$ )  $\delta$  0.78 (9H, t,  $J = 7.6$  Hz), 1.67 (6H, q,  $J = 7.3$  Hz), 1.94-2.04 (2H, m), 2.21 (2H, t,  $J = 6.8$  Hz), 3.82 (2H, t,  $J = 7.0$  Hz), 5.09 (1H, brs), 5.71 (1H, d,  $J = 7.8$  Hz), 7.29 (1H, d,  $J = 7.8$  Hz), 7.81 (1H, brs);  $^{13}\text{C}$  NMR ( $\text{DMSO-}d_6$ )  $\delta$  7.37, 25.14, 25.53, 32.85, 47.22, 58.22, 100.87, 145.65, 150.95, 163.76, 170.62; Anal. Calcd for  $\text{C}_{15}\text{H}_{25}\text{N}_3\text{O}_3$ : C, 60.99; H, 8.53; N, 14.23. Found: C, 61.10; H, 8.59; N, 13.99

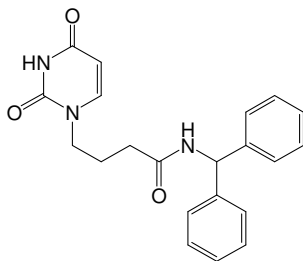

**N-Benzhydryl-4-(2,4-dioxo-3,4-dihydropyrimidin-1(2H)-yl)butanamide (11p)**

Compound **11p** (51 mg, 70%, a colorless solid) was synthesized from **10** (40 mg, 0.20 mmol) and benzhydrylamine (38  $\mu$ L, 0.22 mmol) according to the procedure described for Method C.  $^1\text{H}$  NMR ( $\text{DMSO-}d_6$ )  $\delta$  1.77-1.88 (2H, m), 2.23 (2H, t,  $J = 6.9$  Hz), 3.67 (2H, t,  $J = 6.9$  Hz), 5.51 (1H, dd,  $J = 2.0, 7.9$  Hz), 6.11 (1H, d,  $J = 8.6$  Hz), 7.20-7.35 (10H, m), 7.58 (1H, d,  $J = 7.9$  Hz), 8.78 (1H, d,  $J = 8.6$  Hz), 11.22 (1H, brs);  $^{13}\text{C}$  NMR ( $\text{DMSO-}d_6$ )  $\delta$  24.68, 32.01, 47.16, 55.84, 100.83, 126.87, 127.23,

128.33, 142.52, 145.61, 150.93, 163.72, 170.56; Anal. Calcd for C<sub>21</sub>H<sub>21</sub>N<sub>3</sub>O<sub>3</sub>: C, 69.41; H, 5.82; N, 11.56. Found: C, 69.11; H, 5.85; N, 11.87

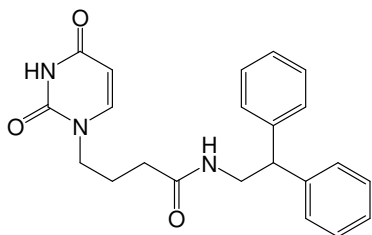

**4-(2,4-Dioxo-3,4-dihydropyrimidin-1(2H)-yl)-N-(2,2-diphenylethyl)butanamide (11q)**

Compound **11q** (58 mg, 75%, a colorless solid) was synthesized from **10** (40 mg, 0.20 mmol) and 2,2-diphenylethylamine (43 mg, 0.22 mmol) according to the procedure described for Method C. <sup>1</sup>H NMR (DMSO-*d*<sub>6</sub>) δ 1.63-1.73 (2H, m), 1.97 (2H, t, *J* = 7.3 Hz), 3.51 (2H, t, *J* = 6.8 Hz), 3.68 (2H, t, *J* = 6.6 Hz), 4.19 (1H, t, *J* = 7.8 Hz), 5.48 (1H, dd, *J* = 1.9, 7.6 Hz), 7.14-7.32 (10H, m), 7.40 (1H, d, *J* = 8.1 Hz), 7.93 (1H, t, *J* = 5.7 Hz), 11.20 (1H, brs); <sup>13</sup>C NMR (DMSO-*d*<sub>6</sub>) δ 24.54, 31.94, 43.01, 47.06, 50.11, 100.73, 126.30, 127.85, 128.39, 142.86, 145.61, 150.82, 163.70, 171.21; Anal. Calcd for C<sub>22</sub>H<sub>23</sub>N<sub>3</sub>O<sub>3</sub>·0.3H<sub>2</sub>O: C, 69.02; H, 6.21; N, 10.98. Found: C, 69.04; H, 6.10; N, 11.38

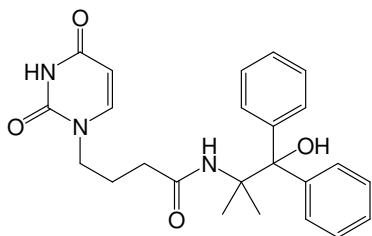

**4-(2,4-Dioxo-3,4-dihydropyrimidin-1(2H)-yl)-N-(1-hydroxy-2-methyl-1,1-diphenylpropan-2-yl)butanamide (11r)**

Compound **11r** (100 mg, 59%, a colorless solid) was synthesized from **10** (80 mg, 0.40 mmol) and 2-amino-2-methyl-1,1-diphenylpropan-1-ol<sup>4</sup> (195 mg, 0.80 mmol) according to the procedure described for Method C. <sup>1</sup>H NMR (DMSO-*d*<sub>6</sub>) δ 1.25 (6H, s), 1.46 (2H, t, *J* = 7.3 Hz), 1.93-1.99 (2H, m), 3.28-3.36 (2H, m), 5.52 (1H, d, *J* = 7.8 Hz), 7.13-7.50 (11H, m), 7.66 (1H, s), 8.39 (1H, s), 11.2 (1H, brs); <sup>13</sup>C NMR (DMSO-*d*<sub>6</sub>) δ 24.49, 32.30, 46.68, 61.43, 81.66, 100.85, 126.33, 126.95, 128.08, 145.46, 150.80, 163.70, 173.02; TOF-HRMS *m/z* [M+H]<sup>+</sup>: Calcd. for C<sub>24</sub>H<sub>28</sub>N<sub>3</sub>O<sub>4</sub>, 422.2080; Found, 422.2084; Purity: 95.34% (Column: Shim-pack XR-ODS 3 mmID×50 mm, 2.2 μm, Column temperature: 40 °C, Mobile phase: 10 mM Phosphate buffred solution pH 6.5 /Acetonitrile :0 min 90/10, 8 min 20/80, 10 min 20/80, Flow rate : 0.8 mL/min, **11r** was eluted 5.6 min)



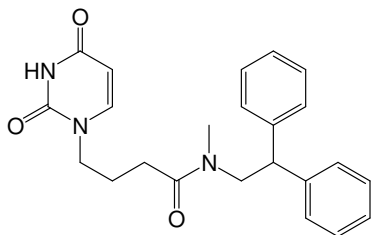

**4-(2,4-Dioxo-3,4-dihydropyrimidin-1(2H)-yl)-N-(2,2-diphenylethyl)-N-methylbutanamide (11s)**

Compound **11s** (80 mg, 50%, a colorless solid) was synthesized from **10** (40 mg, 0.20 mmol) and 2-(methylamino)-1,1-diphenylethanol<sup>5</sup> (91 mg, 0.40 mmol) according to the procedure described for Method C. <sup>1</sup>H NMR (DMSO-*d*<sub>6</sub>) δ 1.57-1.74 (2H, m), 1.99 (0.8H, t, *J* = 7.0 Hz), 2.15 (1.2H, t, *J* = 7.0 Hz), 2.68 (1.8H, s), 2.72 (1.2H, s), 3.50-3.58 (2H, m), 3.94 (2H, d, *J* = 7.8 Hz), 4.26-4.38 (1H, m), 5.50 (0.6H, d, *J* = 7.8 Hz), 5.53 (0.4H, d, *J* = 7.8 Hz), 7.16-7.36 (10H, m), 7.41 (0.6H, d, *J* = 7.8 Hz), 7.52 (0.4H, d, *J* = 7.8 Hz), 11.2 (1H, brs); <sup>13</sup>C NMR (DMSO-*d*<sub>6</sub>) δ 23.83, 24.12, 28.44, 29.26, 33.32, 35.49, 47.09, 48.58, 49.04, 51.46, 53.87, 100.78, 100.83, 126.38, 126.58, 127.97, 128.08, 128.33, 128.39, 142.20, 142.55, 145.54, 150.86, 163.69, 171.07, 171.16; Anal. Calcd for C<sub>23</sub>H<sub>25</sub>N<sub>3</sub>O<sub>3</sub>: C, 70.57; H, 6.44; N, 10.73. Found: C, 70.40; H, 6.56; N, 10.71

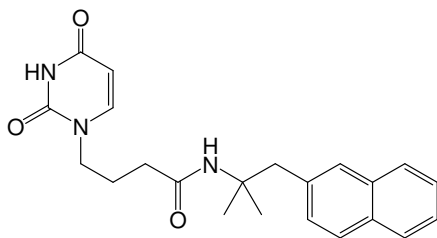

**4-(2,4-Dioxo-3,4-dihydropyrimidin-1(2H)-yl)-N-(2-methyl-1-(naphthalen-2-yl)propan-2-yl)butanamide (11t)**

Compound **11t** (51 mg, 61%, a colorless solid) was synthesized from **10** (40 mg, 0.20 mmol) and 2-methyl-1-(naphthalen-2-yl)propan-2-amine<sup>6</sup> (48 mg, 0.24 mmol) according to the procedure described for Method C. <sup>1</sup>H NMR (DMSO-*d*<sub>6</sub>) δ 1.23 (6H, s), 1.82-1.90 (2H, m), 2.02-2.09 (2H, m), 3.15 (2H, s), 3.68 (2H, t, *J* = 7.0 Hz), 5.55 (1H, dd, *J* = 2.2, 8.1 Hz), 7.26 (1H, s), 7.30 (1H, s), 7.42-7.49 (2H, m), 7.56 (1H, s), 7.62 (1H, d, *J* = 7.6 Hz), 7.79-7.88 (3H, m), 11.22 (1H, brs); <sup>13</sup>C NMR (DMSO-*d*<sub>6</sub>) δ 24.95, 27.12, 32.94, 43.45, 47.20, 53.20, 100.87, 125.27, 125.84, 126.83, 127.28, 127.33, 128.39, 129.21, 131.65, 132.81, 136.16, 145.65, 150.95, 163.76, 171.30; Anal. Calcd for C<sub>22</sub>H<sub>25</sub>N<sub>3</sub>O<sub>3</sub>·0.3H<sub>2</sub>O: C, 68.66; H, 6.70; N, 10.92. Found: C, 68.75; H, 6.64; N, 11.16

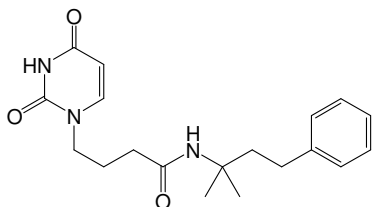

**4-(2,4-Dioxo-3,4-dihydropyrimidin-1(2H)-yl)-N-(2-methyl-4-phenylbutan-2-yl)butanamide (11u)**

Compound **11u** (53 mg, 70%, a colorless solid) was synthesized from **10** (40 mg, 0.20 mmol) and 1,1-dimethyl-3-phenyl-propylamine hydrochloride<sup>7</sup> (46 mg, 0.23 mmol) according to the procedure described for Method C. <sup>1</sup>H NMR (DMSO-*d*<sub>6</sub>) δ 1.25 (6H, s), 1.74-1.93 (4H, m), 2.04-2.10 (2H, m), 2.45-2.52 (2H, m), 3.66 (2H, t, *J* = 7.0 Hz), 5.54 (1H, dd, *J* = 1.9, 7.6 Hz), 7.12-7.27 (5H, m), 7.28 (1H, s), 7.61 (1H, d, *J* = 7.6 Hz), 11.22 (1H, brs); <sup>13</sup>C NMR (CDCl<sub>3</sub>) δ 24.99, 27.10, 30.75, 33.21, 41.72, 47.77, 53.93, 102.44, 125.83, 128.38, 128.43, 142.14, 144.74, 151.35, 163.74, 170.86; Anal. Calcd for C<sub>19</sub>H<sub>25</sub>N<sub>3</sub>O<sub>3</sub>: C, 66.45; H, 7.34; N, 12.24. Found: C, 66.18; H, 7.49; N, 12.01

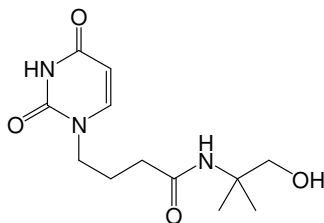

**4-(2,4-Dioxo-3,4-dihydropyrimidin-1(2H)-yl)-N-(1-hydroxy-2-methylpropan-2-yl)butanamide (11v)**

Compound **11v** (102 mg, 83%, a colorless solid) was synthesized from **10** (92 mg, 0.46 mmol) and 2-amino-2-methyl-1-propanol (82 mg, 0.92 mmol) according to the procedure described for Method C. <sup>1</sup>H NMR (DMSO-*d*<sub>6</sub>) δ 1.14 (6H, s), 1.70-1.80 (2H, m), 2.04 (2H, t, *J* = 7.6 Hz), 3.36 (2H, d, *J* = 5.7 Hz), 3.63 (2H, t, *J* = 7.0 Hz), 4.78 (1H, t, *J* = 5.9 Hz), 5.52 (1H, d, *J* = 7.8 Hz), 7.23 (1H, brs), 7.58 (1H, d, *J* = 8.1 Hz), 11.2 (1H, brs); <sup>13</sup>C NMR (DMSO-*d*<sub>6</sub>) δ 23.68, 24.67, 32.70, 47.12, 54.18, 67.23, 100.83, 145.69, 150.95, 163.75, 171.25; Anal. Calcd for C<sub>12</sub>H<sub>19</sub>N<sub>3</sub>O<sub>4</sub>: C, 53.52; H, 7.11; N, 15.60. Found: C, 53.30; H, 7.11; N, 15.36

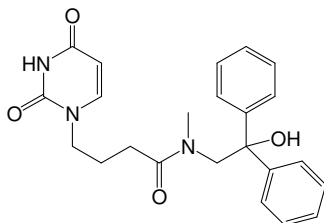

**4-(2,4-Dioxo-3,4-dihydropyrimidin-1(2H)-yl)-N-(2-hydroxy-2,2-diphenylethyl)-N-methylbutanamide**

**amide (11w)**

Compound **11w** (23 mg, 14%, a colorless solid) was synthesized from **10** (80 mg, 0.40 mmol) and 2-(methylamino)-1,1-diphenylethanol<sup>8</sup> (182 mg, 0.80 mmol) according to the procedure described for Method C. <sup>1</sup>H NMR (CDCl<sub>3</sub>) δ 1.95-2.05 (2H, m), 2.29 (2H, t, *J* = 6.2 Hz), 2.52 (3H, s), 3.77 (2H, t, *J* = 7.0 Hz), 4.28 (2H, s), 5.45 (1H, s), 5.67 (1H, d, *J* = 8.1 Hz), 7.21-7.48 (11H, m), 8.54 (1H, brs); <sup>13</sup>C NMR (DMSO-*d*<sub>6</sub>) δ 23.84, 24.28, 28.49, 29.22, 36.15, 37.18, 47.03, 47.16, 56.50, 58.64, 77.38, 78.30, 100.82, 126.11, 126.51, 126.83, 127.65, 127.78, 145.56, 145.90, 146.11, 150.84, 150.87, 163.72, 163.75, 172.26, 173.28; Anal. Calcd for C<sub>23</sub>H<sub>25</sub>N<sub>3</sub>O<sub>4</sub>: C, 67.80; H, 6.18; N, 10.31. Found: C, 67.65; H, 6.25; N, 10.18

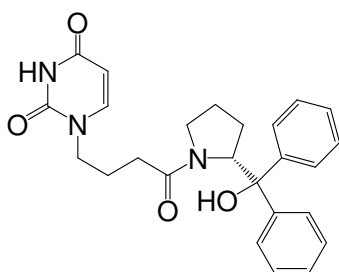**(R)-1-(4-(2-(Hydroxydiphenylmethyl)pyrrolidin-1-yl)-4-oxobutyl)pyrimidine-2,4(1H,3H)-dione (12b)**

Compound **12b** (63 mg, 66%, a colorless foam) was synthesized from **10** (40 mg, 0.22 mmol) and (*R*)-(+)- $\alpha$ ,  $\alpha$ -diphenyl-2-pyrrolidinemethanol (56 mg, 0.22 mmol) according to the procedure described for Method D. <sup>1</sup>H NMR (CDCl<sub>3</sub>) δ 1.01-1.09 (1H, m), 1.55-1.65 (1H, m), 1.91-2.10 (4H, m), 2.19-2.40 (2H, m), 3.02-3.13 (1H, m), 3.35-3.47 (1H, m), 3.51-3.60 (1H, m), 3.66-3.79 (1H, m), 5.13 (1H, dd, *J* = 5.7, 8.4 Hz), 5.69 (1H, dd, *J* = 1.9, 7.8 Hz), 6.69 (1H, s), 7.13 (1H, d, *J* = 7.8 Hz), 7.20-7.43 (10H, m), 8.77 (1H, brs); <sup>13</sup>C NMR (CDCl<sub>3</sub>) δ 23.27, 23.87, 29.80, 31.02, 47.72, 48.75, 67.39, 81.57, 102.13, 127.34, 127.40, 127.57, 127.87, 127.98, 143.52, 145.03, 146.06, 150.82, 163.54, 173.77; Anal. Calcd for C<sub>25</sub>H<sub>27</sub>N<sub>3</sub>O<sub>4</sub>·0.6H<sub>2</sub>O: C, 67.58; H, 6.40; N, 9.46. Found: C, 67.62; H, 6.42; N, 9.23; [ $\alpha$ ]<sub>D</sub><sup>25</sup> = 102.46 (*c* 1.05, CHCl<sub>3</sub>)

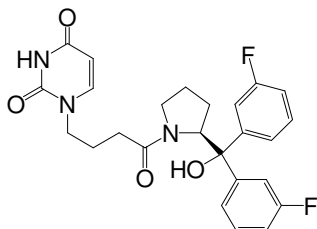**(S)-1-(4-(2-(Bis(3-fluorophenyl)(hydroxy)methyl)pyrrolidin-1-yl)-4-oxobutyl)pyrimidine-2,4(1H,3H)-dione (12c)**

Compound **12c** (80 mg, 85%, a colorless solid) was synthesized from **10** (40 mg, 0.22 mmol) and (*S*)- $\alpha$ ,  $\alpha$ -bis(3-fluorophenyl)-2-pyrrolidinemethanol **8a** (64 mg, 0.22 mmol) according to the procedure described for Method D.  $^1\text{H}$  NMR ( $\text{CDCl}_3$ )  $\delta$  1.08-1.21 (1H, m), 1.57-1.72 (1H, m), 1.88-2.13 (4H, m), 2.21-2.43 (2H, m), 3.06-3.15 (1H, m), 3.39-3.48 (1H, m), 3.54-3.80 (2H, m), 5.03 (1H, dd,  $J = 5.7, 8.6$  Hz), 5.71 (1H, dd,  $J = 2.4, 7.8$  Hz), 6.93-7.35 (10H, m), 8.77 (1H, brs);  $^{13}\text{C}$  NMR ( $\text{CDCl}_3$ )  $\delta$  23.35, 23.91, 29.77, 31.10, 47.70, 48.76, 67.42, 80.97, 102.28, 114.40, 114.61, 114.68, 114.90, 114.94, 115.16, 123.02, 123.05, 123.42, 128.99, 129.08, 129.50, 129.58, 144.76, 145.91, 145.97, 148.06, 148.12, 150.78, 161.30, 161.34, 163.36, 163.74, 163.79, 174.09; Anal. Calcd for  $\text{C}_{25}\text{H}_{25}\text{F}_2\text{N}_3\text{O}_4$ : C, 63.96; H, 5.37; N, 8.95. Found: C, 63.82; H, 5.20; N, 9.21;  $[\alpha]_D^{25} = -121.24$  ( $c$  0.32,  $\text{CHCl}_3$ )

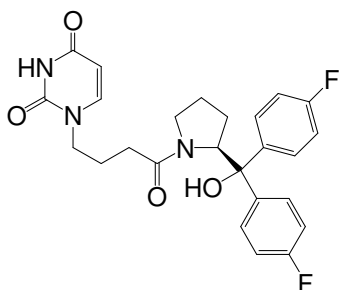

**(*S*)-1-(4-(2-(Bis(4-fluorophenyl)(hydroxy)methyl)pyrrolidin-1-yl)-4-oxobutyl)pyrimidine-2,4(1*H*,3*H*)-dione (**12d**)**

Compound **12d** (80 mg, 77%, a colorless solid) was synthesized from **10** (40 mg, 0.22 mmol) and (*S*)- $\alpha$ ,  $\alpha$ -bis(4-fluorophenyl)-2-pyrrolidinemethanol **8b** (64 mg, 0.22 mmol) according to the procedure described for Method D.  $^1\text{H}$  NMR ( $\text{CDCl}_3$ )  $\delta$  0.95-1.08 (1H, m), 1.57-1.69 (1H, m), 1.84-2.10 (4H, m), 2.23-2.44 (2H, m), 3.00-3.09 (1H, m), 3.36-3.45 (1H, m), 3.61-3.84 (2H, m), 5.08 (1H, dd,  $J = 4.5, 8.6$  Hz), 5.71 (1H, d,  $J = 7.8$  Hz), 6.71 (1H, s), 7.00 (4H, t,  $J = 8.9$  Hz), 7.20 (1H, d,  $J = 7.8$  Hz), 7.31-7.37 (4H, m), 8.71 (1H, brs);  $^{13}\text{C}$  NMR ( $\text{CDCl}_3$ )  $\delta$  23.25, 23.97, 29.63, 31.12, 47.76, 48.64, 67.06, 80.93, 102.30, 114.40, 114.60, 114.74, 114.94, 129.20, 129.28, 129.49, 129.56, 139.15, 141.89, 141.93, 144.72, 150.84, 160.74, 161.01, 163.19, 163.39, 163.47, 174.14; Anal. Calcd for  $\text{C}_{25}\text{H}_{25}\text{F}_2\text{N}_3\text{O}_4 \cdot 0.3\text{H}_2\text{O}$ : C, 63.23; H, 5.43; N, 8.85. Found: C, 63.42; H, 5.42; N, 8.86;  $[\alpha]_D^{25} = -105.38$  ( $c$  0.52,  $\text{CHCl}_3$ )

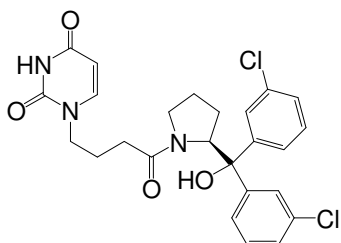

**(S)-1-(4-(2-(Bis(3-chlorophenyl)(hydroxy)methyl)pyrrolidin-1-yl)-4-oxobutyl)pyrimidine-2,4(1H,3H)-dione (12e)**

Compound **12e** (137 mg, 68%, a colorless foam) was synthesized from **10** (79 mg, 0.4 mmol) and (S)- $\alpha$ ,  $\alpha$ -bis(3-chlorophenyl)-2-pyrrolidinemethanol **8c** (190 mg, 0.68 mmol) according to the procedure described for Method D.  $^1\text{H}$  NMR ( $\text{CDCl}_3$ )  $\delta$  1.12-1.26 (1H, m), 1.60-1.70 (1H, m), 1.85-2.10 (4H, m), 2.22-2.42 (2H, m), 3.06 (1H, m), 3.40-3.60 (2H, m), 3.68-3.83 (1H, m), 4.99-5.04 (1H, m), 5.71 (1H, d,  $J = 7.8$  Hz), 6.94 (1H, s), 7.16-7.32 (7H, m), 7.37 (1H, d,  $J = 1.1$  Hz), 7.49 (1H, s), 8.31 (1H, brs);  $^{13}\text{C}$  NMR ( $\text{CDCl}_3$ )  $\delta$  23.39, 23.94, 29.85, 31.16, 47.69, 48.81, 67.45, 81.00, 102.30, 125.72, 125.92, 127.71, 127.80, 127.98, 128.91, 129.39, 134.01, 134.13, 144.80, 145.21, 147.41, 150.84, 163.47, 174.05; Anal. Calcd for  $\text{C}_{25}\text{H}_{25}\text{Cl}_2\text{N}_3\text{O}_4$ : C, 59.77; H, 5.02; N, 8.36. Found: C, 59.64; H, 4.91; N, 8.17;  $[\alpha]_D^{25} = -103.96$  ( $c$  1.06,  $\text{CHCl}_3$ )

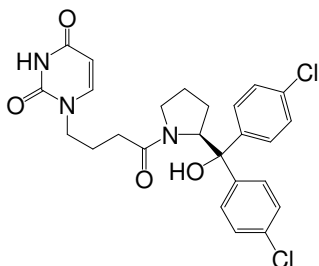

**(S)-1-(4-(2-(Bis(4-chlorophenyl)(hydroxy)methyl)pyrrolidin-1-yl)-4-oxobutyl)pyrimidine-2,4(1H,3H)-dione (12f)**

Compound **12f** (74 mg, 74%, a colorless foam) was synthesized from **10** (40 mg, 0.22 mmol) and (S)- $\alpha$ ,  $\alpha$ -bis(4-chlorophenyl)-2-pyrrolidinemethanol<sup>1</sup> (71 mg, 0.22 mmol) according to the procedure described for Method D.  $^1\text{H}$  NMR ( $\text{CDCl}_3$ )  $\delta$  1.02-1.15 (1H, m), 1.59-1.66 (1H, m), 1.87-2.06 (4H, m), 2.28-2.37 (2H, m), 3.06-3.09 (1H, m), 3.40-3.46 (1H, m), 3.57-3.80 (2H, m), 5.05 (1H, dd,  $J = 5.1, 8.6$  Hz), 5.71 (1H, d,  $J = 7.8$  Hz), 6.77 (1H, brs), 7.16 (1H, d,  $J = 7.8$  Hz), 7.28-7.35 (8H, m), 8.46 (1H, brs);  $^{13}\text{C}$  NMR ( $\text{CDCl}_3$ )  $\delta$  23.34, 23.94, 29.65, 31.14, 47.73, 48.69, 67.05, 80.91, 102.34, 127.84, 128.21, 128.91, 129.24, 133.41, 133.62, 141.82, 144.26, 144.67, 150.88, 163.48, 174.12; Anal. Calcd for  $\text{C}_{25}\text{H}_{25}\text{Cl}_2\text{N}_3\text{O}_4$ : C, 59.77; H, 5.02; N, 8.36. Found: C, 59.48; H, 5.05; N, 8.44;  $[\alpha]_D^{25} = -119.22$  ( $c$  1.05,  $\text{CHCl}_3$ )

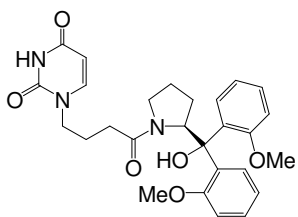

**(S)-1-(4-(2-(Hydroxybis(2-methoxyphenyl)methyl)pyrrolidin-1-yl)-4-oxobutyl)pyrimidine-2,4(1H,3H)-dione (12g)**

Compound **12g** (83 mg, 84%, a colorless foam) was synthesized from **10** (40 mg, 0.22 mmol) and (S)- $\alpha$ ,  $\alpha$ -bis(2-methoxyphenyl)-2-pyrrolidinemethanol **8d** (81 mg, 0.26 mmol) according to the procedure described for Method D.  $^1\text{H}$  NMR (DMSO- $d_6$ )  $\delta$  0.80-2.32 (8H, m), 3.24-3.83 (10H, m), 5.10-5.20 (1H, m), 5.51-5.60 (2H, m), 6.71-7.61 (9H, m), 11.2 (1H, brs); Anal. Calcd for  $\text{C}_{27}\text{H}_{31}\text{N}_3\text{O}_6 \cdot 0.7\text{H}_2\text{O}$ : C, 64.07; H, 6.45; N, 8.30. Found: C, 64.12; H, 6.22; N, 8.68;  $[\alpha]_{\text{D}}^{25} = 100.00$  ( $c$  0.33,  $\text{CHCl}_3$ )

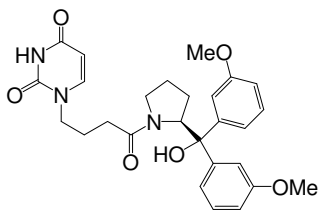

**(S)-1-(4-(2-(Hydroxybis(3-methoxyphenyl)methyl)pyrrolidin-1-yl)-4-oxobutyl)pyrimidine-2,4(1H,3H)-dione (12h)**

Compound **12h** (85 mg, 86%, a colorless foam) was synthesized from **10** (40 mg, 0.22 mmol) and (S)- $\alpha$ ,  $\alpha$ -bis(3-methoxyphenyl)-2-pyrrolidinemethanol **8e** (81 mg, 0.26 mmol) according to the procedure described for Method D.  $^1\text{H}$  NMR ( $\text{CDCl}_3$ )  $\delta$  1.15-1.26 (1H, m), 1.56-1.67 (1H, m), 1.89-2.04 (4H, m), 2.24-2.40 (2H, m), 3.09-3.18 (1H, m), 3.38-3.56 (2H, m), 3.63-3.73 (1H, m), 3.76 (6H, s), 5.04 (1H, t,  $J = 8.1$  Hz), 5.69 (1H, dd,  $J = 2.4, 7.8$  Hz), 6.78-7.08 (7H, m), 7.13 (1H, d,  $J = 7.8$  Hz), 7.18-7.27 (2H, m), 8.84 (1H, brs);  $^{13}\text{C}$  NMR ( $\text{CDCl}_3$ )  $\delta$  23.41, 23.85, 29.99, 31.04, 47.69, 48.91, 55.25, 55.27, 67.87, 81.37, 102.07, 112.08, 112.54, 113.83, 114.44, 119.89, 120.25, 128.34, 128.85, 145.05, 145.16, 147.46, 150.74, 159.21, 159.28, 163.43, 173.65; Anal. Calcd for  $\text{C}_{27}\text{H}_{31}\text{N}_3\text{O}_6 \cdot 0.5\text{H}_2\text{O}$ : C, 64.53; H, 6.42; N, 8.36. Found: C, 64.48; H, 6.43; N, 8.08;  $[\alpha]_{\text{D}}^{25} = -77.19$  ( $c$  1.14,  $\text{CHCl}_3$ )

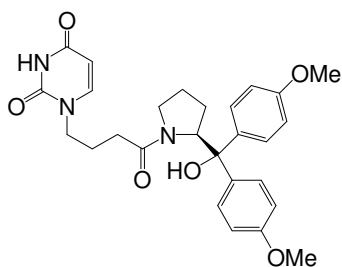

**(S)-1-(4-(2-(Hydroxybis(4-methoxyphenyl)methyl)pyrrolidin-1-yl)-4-oxobutyl)pyrimidine-2,4(1H,3H)-dione (12i)**

Compound **12i** (70 mg, 71%, a colorless foam) was synthesized from **10** (40 mg, 0.22 mmol) and (S)- $\alpha,\alpha$ -bis(4-methoxyphenyl)-2-pyrrolidinemethanol<sup>1</sup> (81 mg, 0.26 mmol) according to the procedure described for Method D. <sup>1</sup>H NMR (CDCl<sub>3</sub>)  $\delta$  0.98-1.08 (1H, m), 1.54-1.63 (1H, m), 1.91-2.08 (4H, m), 2.27-2.39 (2H, m), 3.00-3.09 (1H, m), 3.34-3.43 (1H, m), 3.53-3.84 (2H, m), 3.80 (6H, s), 5.09 (1H, q, 4.9 Hz), 5.69 (1H, d,  $J$  = 7.8 Hz), 6.49 (1H, s), 6.81-6.87 (4H, m), 7.17 (1H, d,  $J$  = 7.6 Hz), 7.24-7.31 (4H, m), 8.36 (1H, brs); <sup>13</sup>C NMR (CDCl<sub>3</sub>)  $\delta$  23.28, 23.91, 29.67, 31.02, 47.78, 48.67, 55.25, 67.17, 81.07, 102.12, 112.85, 113.23, 128.72, 129.01, 135.72, 138.67, 144.99, 150.78, 158.63, 158.85, 163.44, 173.76; Anal. Calcd for C<sub>27</sub>H<sub>31</sub>N<sub>3</sub>O<sub>6</sub>·0.2H<sub>2</sub>O: C, 65.23; H, 6.37; N, 8.45. Found: C, 65.16; H, 6.33; N, 8.42; [ $\alpha$ ]<sub>D</sub><sup>25</sup> = -115.98 ( $c$  0.50, CHCl<sub>3</sub>)

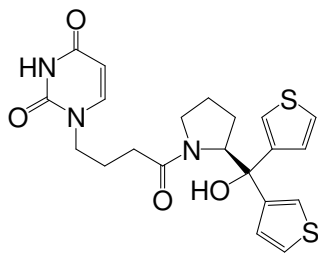

**(S)-1-(4-(2-(Hydroxydithiophen-3-ylmethyl)pyrrolidin-1-yl)-4-oxobutyl)pyrimidine-2,4(1H,3H)-dione (12j)**

Compound **12j** (40 mg, 45%, a colorless foam) was synthesized from **10** (40 mg, 0.22 mmol) and (S)- $\alpha,\alpha$ -bis(3-thienyl)-2-pyrrolidinemethanol **8f** (66 mg, 0.25 mmol) according to the procedure described for Method D. <sup>1</sup>H NMR (CDCl<sub>3</sub>)  $\delta$  1.33-1.70 (2H, m), 1.90-2.05 (4H, m), 2.18-2.39 (2H, m), 2.98-3.08 (1H, m), 3.39-3.48 (1H, m), 3.63-3.79 (2H, m), 4.93 (1H, t,  $J$  = 8.1 Hz), 5.70 (1H, d,  $J$  = 7.8 Hz), 7.08-7.31 (7H, m), 8.25 (1H, brs); <sup>13</sup>C NMR (CDCl<sub>3</sub>)  $\delta$  23.60, 23.98, 29.40, 31.12, 47.75, 48.84, 67.84, 78.96, 102.23, 121.97, 122.82, 124.97, 125.63, 127.17, 127.40, 144.76, 144.90, 146.81, 150.86, 163.54, 173.72; Anal. Calcd for C<sub>21</sub>H<sub>23</sub>N<sub>3</sub>O<sub>4</sub>S<sub>2</sub>: C, 56.61; H, 5.20; N, 9.43. Found: C, 56.43; H, 5.25; N, 9.35; [ $\alpha$ ]<sub>D</sub><sup>25</sup> = -87.02 ( $c$  1.08, CHCl<sub>3</sub>)

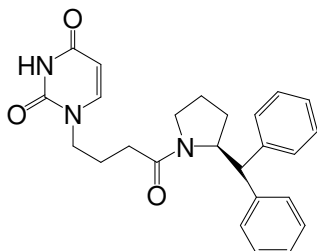

**(S)-1-(4-(2-Benzhydrylpyrrolidin-1-yl)-4-oxobutyl)pyrimidine-2,4(1H,3H)-dione (12k)**

Compound **12k** (80 mg, 96%, a colorless foam) was synthesized from **10** (40 mg, 0.22 mmol) and (S)-2-(diphenylmethyl)pyrrolidine (48 mg, 0.20 mmol) according to the procedure described for Method D. <sup>1</sup>H NMR (DMSO-*d*<sub>6</sub>) δ 0.87-1.25 (0.4H, m), 1.50-1.96 (6.6H, m), 2.15-2.23 (1H, m), 3.09-3.66 (4H, m), 4.00 (0.5H, d, *J* = 11 Hz), 4.44 (0.5H, d, *J* = 5.9 Hz), 4.63-4.65 (0.5H, m), 4.83-4.85 (0.5H, m), 5.52 (1H, d, *J* = 8.1 Hz), 7.11-7.45 (11H, m), 11.2 (1H, brs); Anal. Calcd for C<sub>25</sub>H<sub>27</sub>N<sub>3</sub>O<sub>3</sub>·0.2H<sub>2</sub>O: C, 71.30; H, 6.56; N, 9.98. Found: C, 71.27; H, 6.53; N, 10.03; [α]<sub>D</sub><sup>25</sup> = 36.00 (*c* 0.55, CHCl<sub>3</sub>)

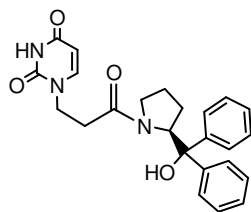

**(S)-1-(3-(2-(Hydroxydiphenylmethyl)pyrrolidin-1-yl)-3-oxopropyl)pyrimidine-2,4(1H,3H)-dione (12l)**

Compound **12l** (59 mg, 64%, a colorless foam) was synthesized from **9** (41 mg, 0.22 mmol) and (S)-(-)-α, α-diphenyl-2-pyrrolidinemethanol (56 mg, 0.22 mmol) according to the procedure described for Method D. <sup>1</sup>H NMR (CDCl<sub>3</sub>) δ 1.12-1.26 (1H, m), 1.60-1.70 (1H, m), 1.85-2.10 (4H, m), 2.22-2.42 (2H, m), 3.06 (1H, m), 3.40-3.60 (2H, m), 3.68-3.83 (1H, m), 4.99-5.04 (1H, m), 5.71 (1H, d, *J* = 7.8 Hz), 6.94 (1H, s), 7.16-7.32 (7H, m), 7.37 (1H, d, *J* = 1.1 Hz), 7.49 (1H, s), 8.31 (1H, brs); <sup>13</sup>C NMR (CDCl<sub>3</sub>) δ 23.17, 29.58, 33.56, 45.36, 48.57, 67.34, 81.64, 101.47, 127.37, 127.45, 127.54, 127.57, 127.76, 127.97, 143.21, 146.01, 146.65, 150.96, 163.66, 172.28; Anal. Calcd for C<sub>24</sub>H<sub>25</sub>N<sub>3</sub>O<sub>4</sub>·0.5H<sub>2</sub>O: C, 67.27; H, 6.12; N, 9.81. Found: C, 67.36; H, 6.19; N, 9.46; [α]<sub>D</sub><sup>25</sup> = -152.44 (*c* 0.45, CHCl<sub>3</sub>)

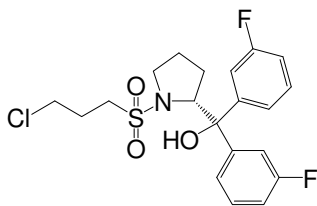



**(*R*)-(1-(3-Chloropropylsulfonyl)pyrrolidin-2-yl)bis(3-fluorophenyl)methanol (13a)**

Compound **13a** (1.80 g, 84%, a colorless solid) was synthesized from (*R*)- $\alpha$ ,  $\alpha$ -bis(3-fluorophenyl)-2-pyrrolidinemethanol **8g** (1.53 g, 5.3 mmol) according to the procedure described for Method E.  $^1\text{H}$  NMR ( $\text{CDCl}_3$ )  $\delta$  1.41-1.49 (1H, m), 1.70-1.80 (1H, m), 1.84-1.95 (1H, m), 2.07-2.23 (3H, m), 2.71-2.85 (2H, m), 3.01 (1H, dt,  $J = 7.6, 11.1$  Hz), 3.25 (1H, s), 3.53-3.58 (2H, m), 3.65-3.73 (1H, m), 5.17 (1H, dd,  $J = 4.3, 8.9$  Hz), 6.94-7.02 (2H, m), 7.16-7.36 (6H, m); FAB-HRMS  $m/z$   $[\text{M}-\text{H}]^-$ : Calcd. for  $\text{C}_{20}\text{H}_{21}\text{ClF}_2\text{NO}_3\text{S}$ , 428.0899; Found, 428.0879

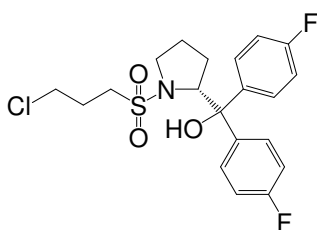

**(*R*)-(1-(3-Chloropropylsulfonyl)pyrrolidin-2-yl)bis(4-fluorophenyl)methanol (13b)**

Compound **13b** (1.83 g, 80%, a colorless solid) was synthesized from (*R*)- $\alpha$ ,  $\alpha$ -bis(4-fluorophenyl)-2-pyrrolidinemethanol **8h** (1.53 g, 5.3 mmol) according to the procedure described for Method E.  $^1\text{H}$  NMR ( $\text{CDCl}_3$ )  $\delta$  1.23-1.38 (1H, m), 1.64-1.80 (1H, m), 1.83-1.94 (1H, m), 2.11-2.27 (3H, m), 2.85-2.97 (3H, m), 3.30 (1H, brs), 3.52-3.68 (3H, m), 5.14 (1H, dd,  $J = 3.8, 8.9$  Hz), 6.96-7.06 (4H, m), 7.34-7.49 (4H, m); FAB-HRMS  $m/z$   $[\text{M}-\text{H}]^-$ : Calcd. for  $\text{C}_{20}\text{H}_{21}\text{ClF}_2\text{NO}_3\text{S}$ , 428.0899; Found, 428.0879

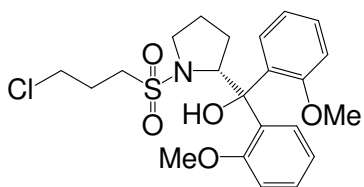

**(*R*)-(1-(3-Chloropropylsulfonyl)pyrrolidin-2-yl)bis(2-methoxyphenyl)methanol (13c)**

Compound **13c** (2.10 g, 73%, a colorless solid) was synthesized from (*R*)- $\alpha$ ,  $\alpha$ -bis(2-methoxyphenyl)-2-pyrrolidinemethanol **8i** (2.0 g, 6.4 mmol) according to the procedure described for Method E.  $^1\text{H}$  NMR ( $\text{CDCl}_3$ )  $\delta$  1.75-1.93 (4H, m), 1.95-2.12 (2H, m), 2.21 (2H, dt,  $J = 4.6, 8.4$  Hz), 3.32-3.42 (3H, m), 3.56 (6H, s), 3.76 (1H, m), 5.10 (1H, d,  $J = 2.2$  Hz), 5.80 (1H, td,  $J = 2.2, 6.8$  Hz), 6.72-6.81 (2H, m), 6.97 (2H, qd,  $J = 1.4, 7.3$  Hz), 7.16-7.24 (2H, m), 7.52 (1H, dd,  $J = 1.6, 7.8$  Hz), 7.77 (1H, dd,  $J = 1.6, 7.8$  Hz); FAB-HRMS  $m/z$   $[\text{M}+\text{Na}]^+$ : Calcd. for  $\text{C}_{22}\text{H}_{28}\text{ClNO}_5\text{SNa}$ , 476.1274; Found, 476.1283

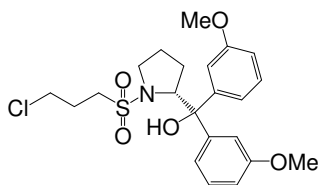

**(R)-(1-(3-Chloropropylsulfonyl)pyrrolidin-2-yl)bis(3-methoxyphenyl)methanol (13d)**

Compound **13d** (679 mg, 88%, a colorless solid) was synthesized from (*R*)- $\alpha$ ,  $\alpha$ -bis(3-methoxyphenyl)-2-pyrrolidinemethanol **8j** (540 mg, 1.7 mmol) according to the procedure described for Method E.  $^1\text{H}$  NMR ( $\text{CDCl}_3$ )  $\delta$  1.20-1.36 (1H, m), 1.49-1.57 (1H, m), 1.90-1.96 (1H, m), 2.03-2.09 (2H, m), 2.15-2.23 (1H, m), 2.48-2.56 (1H, m), 2.63-2.70 (1H, m), 3.00-3.14 (1H, m), 3.49 (2H, td,  $J = 4.0, 6.4$  Hz), 3.73-3.78 (1H, m), 3.78 (3H, s), 3.79 (3H, s), 5.26 (1H, dd,  $J = 4.0, 8.8$  Hz), 6.77-6.87 (2H, m), 7.00 (1H, dd,  $J = 0.8, 8.0$  Hz), 7.04 (1H, t,  $J = 1.6$  Hz), 7.09-7.11 (2H, m), 7.20-7.20 (2H, m); FAB-HRMS  $m/z$   $[\text{M}+\text{Na}]^+$ : Calcd. for  $\text{C}_{22}\text{H}_{28}\text{ClNO}_5\text{SNa}$ , 476.1274; Found, 476.1268

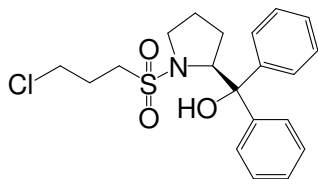

**(S)-(1-(3-Chloropropylsulfonyl)pyrrolidin-2-yl)diphenylmethanol (13f)**

Compound **13f** (1.3 g, 84%, a colorless solid) was synthesized from (*S*)-(-)- $\alpha$ ,  $\alpha$ -diphenyl-2-pyrrolidinemethanol **8i** (1.0 g, 3.95 mmol) according to the procedure described for Method E.  $^1\text{H}$  NMR ( $\text{CDCl}_3$ )  $\delta$  1.38-1.44 (1H, m), 1.65-1.77 (1H, m), 1.88-2.00 (1H, m), 2.04-2.24 (3H, m), 2.56-2.69 (2H, m), 2.94-3.03 (1H, m), 3.02 (1H, s), 3.48-3.54 (2H, m), 3.66-3.75 (1H, m), 5.28 (1H, dd,  $J = 4.1, 8.9$  Hz), 7.22-7.36 (6H, m), 7.41-7.46 (2H, m), 7.50-7.54 (2H, m); FAB-HRMS  $m/z$   $[\text{M}-\text{H}]^-$ : Calcd. for  $\text{C}_{20}\text{H}_{23}\text{ClNO}_3\text{S}$ , 392.1087; Found, 392.1067

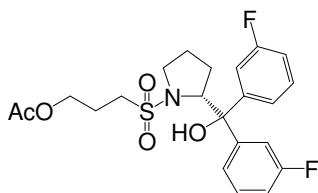

**(R)-3-(2-(Bis(3-fluorophenyl)(hydroxy)methyl)pyrrolidin-1-ylsulfonyl)propyl acetate (14a)**

Compound **14a** (666 mg, 63%, a colorless solid) was synthesized from **13a** (1.0 g, 2.33 mmol) according to the procedure described for Method F.  $^1\text{H}$  NMR ( $\text{CDCl}_3$ )  $\delta$  1.43-1.50 (1H, m), 1.69-1.79 (1H, m), 1.83-2.09 (3H, m), 2.07 (3H, s), 2.12-2.22 (1H, m), 2.54-2.74 (2H, m), 3.00 (1H,

dt,  $J = 7.3, 10.8$  Hz), 3.26 (1H, s), 3.66-3.74 (1H, m), 4.04 (2H, t,  $J = 6.2$  Hz), 5.20 (1H, dd,  $J = 4.1, 8.9$  Hz), 6.94-7.01 (2H, m), 7.16-7.21 (2H, m), 7.25-7.36 (4H, m); FAB-HRMS  $m/z$   $[M-H]^-$ : Calcd. for  $C_{22}H_{24}F_2NO_5S$ , 452.1343; Found, 452.1351

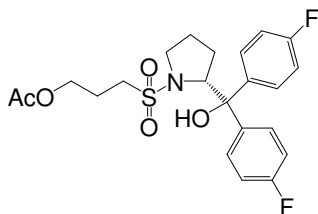

**(*R*)-3-(2-(Bis(4-fluorophenyl)(hydroxy)methyl)pyrrolidin-1-ylsulfonyl)propyl acetate (**14b**)**

Compound **14b** (738 mg, 70%, a colorless solid) was synthesized from **13b** (1.0 g, 2.33 mmol) according to the procedure described for Method F.  $^1H$  NMR ( $CDCl_3$ )  $\delta$  1.29-1.40 (1H, m), 1.64-1.80 (1H, m), 1.82-1.93 (1H, m), 1.96-2.06 (2H, m), 2.08 (3H, s), 2.11-2.25 (1H, m), 2.63-2.97 (3H, m), 3.27 (1H, s), 3.60-3.69 (1H, m), 4.08 (2H, t,  $J = 6.2$  Hz), 5.17 (1H, dd,  $J = 4.1, 8.9$  Hz), 6.97-7.06 (4H, m), 7.34-7.40 (2H, m), 7.43-7.49 (2H, m); FAB-HRMS  $m/z$   $[M-H]^-$ : Calcd. for  $C_{22}H_{24}F_2NO_5S$ , 452.1343; Found, 452.1373

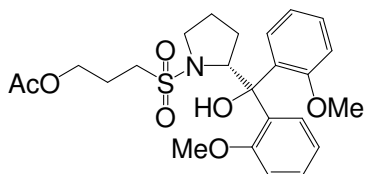

**(*R*)-3-(2-(Hydroxybis(2-methoxyphenyl)methyl)pyrrolidin-1-ylsulfonyl)propyl acetate (**14c**)**

Compound **14c** (715 mg, 68%, a colorless solid) was synthesized from **13c** (1.0 g, 2.2 mmol) according to the procedure described for Method F.  $^1H$  NMR ( $CDCl_3$ )  $\delta$  1.63-1.89 (4H, m), 1.98-2.10 (2H, m), 2.04 (3H, s), 2.17-2.25 (2H, m), 3.32-3.42 (1H, m), 3.56 (6H, s), 3.73-3.94 (3H, m), 5.09 (1H, brs), 5.81 (1H, brt,  $J = 5.4$  Hz), 6.73 (1H, d,  $J = 8.1$  Hz), 6.80 (1H, d,  $J = 8.4$  Hz), 6.97 (2H, q,  $J = 7.6$  Hz), 7.20 (2H, brt,  $J = 7.3$  Hz), 7.53 (1H, dd,  $J = 1.6, 7.8$  Hz), 7.78 (1H, dd,  $J = 1.9, 7.8$  Hz); FAB-HRMS  $m/z$   $[M+Na]^+$ : Calcd. for  $C_{24}H_{31}NO_7SNa$ , 500.1719; Found, 500.1723

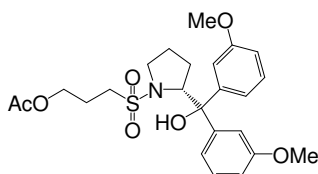

**(*R*)-3-(2-(Hydroxybis(3-methoxyphenyl)methyl)pyrrolidin-1-ylsulfonyl)propyl acetate (**14d**)**

Compound **14d** (442 mg, 70%, a colorless gum) was synthesized from **13d** (600 mg, 1.32 mmol) according to the procedure described for Method F.  $^1H$  NMR ( $CDCl_3$ )  $\delta$  1.52-1.59 (1H, m),

1.69-1.73 (1H, m), 1.89-1.97 (3H, m), 2.06 (3H, s), 2.12-2.18 (1H, m), 2.34-2.41 (1H, m), 2.54-2.60 (1H, m), 3.01-3.08 (1H, m), 3.78 (6H, s), 3.78 (1H, s), 3.78 (1H, s), 3.98 (2H, td,  $J = 1.2, 6.4$  Hz), 5.28 (1H, dd,  $J = 3.6, 8.8$  Hz), 6.77-6.79 (2H, m), 7.00 (1H, dd,  $J = 1.2, 8.0$  Hz), 7.05 (1H, t,  $J = 2.0$  Hz), 7.11-7.13 (2H, m), 7.20-7.26 (2H, m); FAB-HRMS  $m/z$   $[M+Na]^+$ : Calcd. for  $C_{24}H_{31}NO_7SNa$ , 500.1719; Found, 500.1739

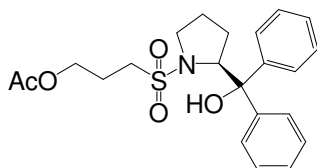

**(S)-3-(2-(Hydroxydiphenylmethyl)pyrrolidin-1-ylsulfonyl)propyl acetate (14f)**

Compound **14f** (710 mg, 67%, a colorless solid) was synthesized from **13f** (1.0 g, 2.54 mmol) according to the procedure described for Method F.  $^1H$  NMR ( $DMSO-d_6$ )  $\delta$  1.63 (4H, quint,  $J = 7.3$  Hz), 1.76-1.84 (2H, m), 2.00 (3H, s), 2.04-2.15 (1H, m), 2.29-2.40 (1H, m), 3.17-3.27 (1H, m), 3.57-3.64 (1H, m), 3.82 (2H, t,  $J = 6.8$  Hz), 5.21 (1H, brd,  $J = 5.9$  Hz), 5.65 (1H, brs), 7.10-7.32 (6H, m), 7.45-7.52 (4H, m); FAB-HRMS  $m/z$   $[M-H]^-$ : Calcd. for  $C_{22}H_{26}NO_5S$ , 416.1532; Found, 416.1532

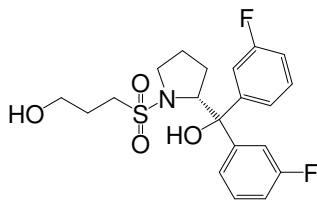

**(R)-3-(2-(bis(3-fluorophenyl)(hydroxy)methyl)pyrrolidin-1-ylsulfonyl)propan-1-ol (15a)**

Compound **15a** (416 mg, 92%, a colorless solid) was synthesized from **14a** (500 mg, 1.10 mmol) according to the procedure described for Method G.  $^1H$  NMR ( $CDCl_3$ )  $\delta$  1.35-1.49 (1H, m), 1.67-1.77 (2H, m), 1.82-1.96 (3H, m), 2.10-2.24 (1H, m), 2.68 (1H, quint,  $J = 7.3$  Hz), 2.81 (1H, quint,  $J = 7.3$  Hz), 3.00 (1H, dt,  $J = 7.3, 11.1$  Hz), 3.63 (1H, s), 3.63-3.74 (3H, m), 5.17 (1H, dd,  $J = 4.3, 8.9$  Hz), 6.93-7.02 (2H, m), 7.18-7.36 (6H, m); FAB-HRMS  $m/z$   $[M-H]^-$ : Calcd. for  $C_{20}H_{22}F_2NO_4S$ , 410.1238; Found, 410.1218

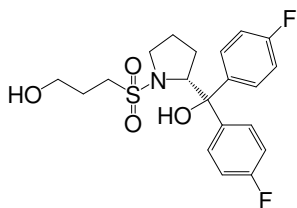

**(R)-3-(2-(Bis(4-fluorophenyl)(hydroxy)methyl)pyrrolidin-1-ylsulfonyl)propan-1-ol (15b)**

Compound **15b** (416 mg, 92%, a colorless solid) was synthesized from **14b** (500 mg, 1.10 mmol) according to the procedure described for Method G.  $^1\text{H}$  NMR ( $\text{CDCl}_3$ )  $\delta$  1.20-1.35 (1H, m), 1.65-1.74 (2H, m), 1.81-2.00 (3H, m), 2.17-2.19 (1H, m), 2.74-2.96 (3H, m), 3.59-3.76 (3H, m), 3.62 (1H, s), 5.12 (1H, dd,  $J$  = 4.1, 8.9 Hz), 6.95-7.05 (4H, m), 7.34-7.40 (2H, m), 7.43-7.49 (2H, m); FAB-HRMS  $m/z$   $[\text{M}-\text{H}]^-$ : Calcd. for  $\text{C}_{20}\text{H}_{22}\text{F}_2\text{NO}_4\text{S}$ , 410.1238; Found, 410.1259

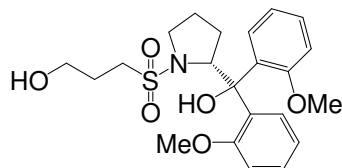

**(R)-3-(2-(Hydroxybis(2-methoxyphenyl)methyl)pyrrolidin-1-ylsulfonyl)propan-1-ol (15c)**

Compound **15c** (438 mg, 96%, a colorless foam) was synthesized from **14c** (500 mg, 1.05 mmol) according to the procedure described for Method G.  $^1\text{H}$  NMR ( $\text{CDCl}_3$ )  $\delta$  1.56-1.71 (2H, m), 1.79-1.92 (2H, m), 1.98-2.05 (2H, m), 2.17-2.25 (2H, m), 3.32-3.45 (1H, m), 3.50 (2H, t,  $J$  = 6.2 Hz), 3.56 (6H, s), 3.72-3.80 (1H, m), 5.10 (1H, d,  $J$  = 1.9 Hz), 5.81 (1H, brt,  $J$  = 5.7 Hz), 6.74 (1H, d,  $J$  = 8.1 Hz), 6.80 (1H, d,  $J$  = 8.1 Hz), 6.97 (2H, q,  $J$  = 7.6 Hz), 7.20 (2H, brt,  $J$  = 8.1 Hz), 7.53 (1H, brd,  $J$  = 7.3 Hz), 7.79 (1H, brd,  $J$  = 7.3); FAB-HRMS  $m/z$   $[\text{M}+\text{Na}]^+$ : Calcd. for  $\text{C}_{22}\text{H}_{29}\text{NO}_6\text{SNa}$ , 458.1613; Found, 458.1624

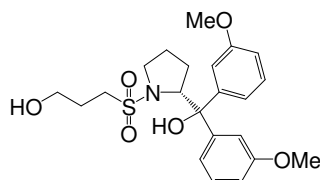

**(R)-3-(2-(Hydroxybis(3-methoxyphenyl)methyl)pyrrolidin-1-ylsulfonyl)propan-1-ol (15d)**

Compound **15d** (361 mg, 99%, a colorless gum) was synthesized from **14d** (400 mg, 0.84 mmol) according to the procedure described for Method G.  $^1\text{H}$  NMR ( $\text{CDCl}_3$ )  $\delta$  1.44-1.52 (1H, m), 1.67-1.74 (2H, m), 1.85-1.95 (3H, m), 2.14-2.19 (1H, m), 2.53-2.60 (1H, m), 2.66-2.70 (1H, m), 2.99-3.02 (1H, m), 3.24 (1H, s), 3.60-3.66 (2H, m), 3.71-3.76 (1H, m), 3.79 (6H, m), 5.25 (1H, dd,  $J$  = 4.0, 8.8 Hz), 6.77-6.79 (2H, m), 6.98 (1H, d,  $J$  = 5.4 Hz), 7.09 (1H, t,  $J$  = 2.0 Hz), 7.11-7.13 (2H, m), 7.19-7.26 (2H, m); FAB-HRMS  $m/z$   $[\text{M}-\text{H}]^-$ : Calcd. for  $\text{C}_{22}\text{H}_{28}\text{NO}_6\text{S}$ , 434.1637; Found, 434.1653

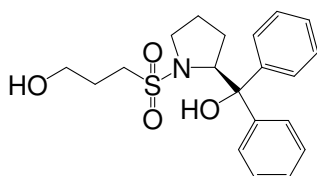

**(S)-3-(2-(Hydroxydiphenylmethyl)pyrrolidin-1-ylsulfonyl)propan-1-ol (15f)**

Compound **15f** (428 mg, 95%, a colorless solid) was synthesized from **14f** (500 mg, 1.20 mmol) according to the procedure described for Method G.  $^1\text{H}$  NMR ( $\text{CDCl}_3$ )  $\delta$  1.34-1.45 (1H, m), 1.62-1.78 (1H, m), 1.83-1.98 (3H, m), 2.12-2.26 (1H, m), 2.57 (1H, quint,  $J = 6.8$  Hz), 2.69 (1H, quint,  $J = 7.3$  Hz), 2.98 (1H, dt,  $J = 7.6, 10.5$  Hz), 3.28 (1H, s), 3.61-3.75 (3H, m), 5.27 (1H, dd,  $J = 3.8, 8.6$  Hz), 7.22-7.36 (6H, m), 7.43-7.46 (2H, m), 7.52-7.55 (2H, m); FAB-HRMS  $m/z$   $[\text{M}-\text{H}]^-$ : Calcd. for  $\text{C}_{20}\text{H}_{24}\text{NO}_4\text{S}$ , 374.1426; Found, 374.1396

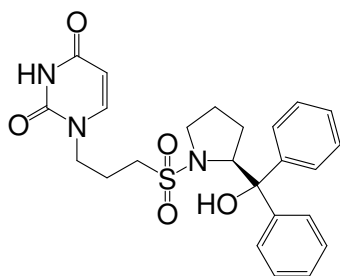

**(S)-1-(3-(2-(Hydroxydiphenylmethyl)pyrrolidin-1-ylsulfonyl)propyl)pyrimidine-2,4(1H,3H)-dione (16b)**

Compound **16b** (317 mg, 63%, a colorless foam) was synthesized from **15f** (400 mg, 1.07 mmol) according to the procedure described for Method H.  $^1\text{H}$  NMR ( $\text{CDCl}_3$ )  $\delta$  1.47-1.54 (1H, m), 1.69-1.76 (1H, m), 1.90-2.04 (3H, m), 2.14-2.24 (1H, m), 2.32-2.39 (1H, m), 2.46-2.53 (1H, m), 2.98 (1H, s), 3.00-3.06 (1H, m), 3.70-3.76 (3H, m), 5.30-5.33 (1H, dd,  $J = 4.0, 9.2$  Hz), 5.70 (1H, dd,  $J = 2.0, 7.6$  Hz), 7.18 (1H, d,  $J = 7.6$  Hz), 7.22-7.34 (6H, m), 7.42-7.44 (2H, m), 7.52-7.55 (2H, m), 8.38 (1H, brs);  $^{13}\text{C}$  NMR ( $\text{CDCl}_3$ )  $\delta$  22.99, 26.00, 29.10, 47.24, 49.51, 50.64, 67.16, 81.16, 102.52, 126.67, 126.99, 127.34, 127.36, 128.15, 128.19, 144.12, 144.60, 145.76, 150.80, 163.47; Anal. Calcd for  $\text{C}_{24}\text{H}_{27}\text{N}_3\text{O}_5\text{S} \cdot 0.3\text{H}_2\text{O}$ : C, 60.69; H, 5.86; N, 8.85. Found: C, 60.69; H, 5.79; N, 8.93;  $[\alpha]_D^{25} = 13.17$  ( $c$  0.41,  $\text{CHCl}_3$ )

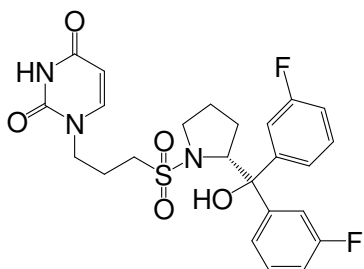

**(*R*)-1-(3-(2-(Bis(3-fluorophenyl)(hydroxy)methyl)pyrrolidin-1-ylsulfonyl)propyl)pyrimidine-2,4(1*H*,3*H*)-dione (16c)**

Compound **16c** (270 mg, 55%, a colorless foam) was synthesized from **15a** (400 mg, 0.97 mmol) according to the procedure described for Method H.  $^1\text{H}$  NMR ( $\text{CDCl}_3$ )  $\delta$  1.53-1.58 (1H, m), 1.72-1.91 (2H, m), 2.02-2.17 (3H, m), 2.48-2.66 (2H, m), 3.03-3.10 (1H, m), 3.34 (1H, s), 3.67-3.79 (3H, m), 5.22 (1H, dd,  $J = 3.8, 8.6$  Hz), 5.73 (1H, d,  $J = 7.8$  Hz), 6.93-7.00 (2H, m), 7.17-7.33 (7H, m), 8.66 (1H, brs);  $^{13}\text{C}$  NMR ( $\text{CDCl}_3$ )  $\delta$  23.00, 26.01, 29.08, 47.30, 49.61, 50.84, 66.74, 80.53, 102.76, 113.85, 114.08, 114.14, 114.32, 114.37, 114.53, 114.58, 122.23, 122.26, 122.77, 122.79, 129.69, 129.73, 129.78, 129.81, 144.46, 146.25, 146.32, 147.91, 147.97, 151.09, 161.31, 161.47, 163.48, 163.76, 163.92; Anal. Calcd for  $\text{C}_{24}\text{H}_{25}\text{F}_2\text{N}_3\text{O}_5\text{S} \cdot 0.3\text{H}_2\text{O}$ : C, 56.42; H, 5.05; N, 8.22. Found: C, 56.51; H, 4.88; N, 8.35;  $[\alpha]_D^{25} = -1.98$  ( $c$  0.60,  $\text{CHCl}_3$ )

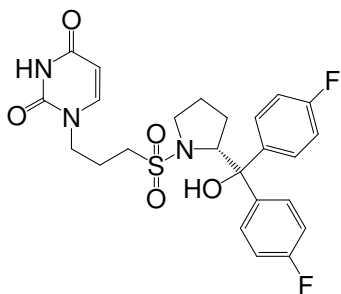

**(*R*)-1-(3-(2-(Bis(4-fluorophenyl)(hydroxy)methyl)pyrrolidin-1-ylsulfonyl)propyl)pyrimidine-2,4(1*H*,3*H*)-dione (16d)**

Compound **16d** (299 mg, 61%, a colorless solid) was synthesized from **15b** (400 mg, 0.97 mmol) according to the procedure described for Method H.  $^1\text{H}$  NMR ( $\text{DMSO}-d_6$ )  $\delta$  1.71-1.79 (5H, m), 2.00-2.09 (1H, m), 2.43-2.72 (2H, m), 3.20-3.27 (1H, m), 3.51-3.70 (3H, m), 5.06 (1H, d,  $J = 6.5$  Hz), 5.56 (1H, d,  $J = 7.8$  Hz), 5.78 (1H, brs), 6.98-7.12 (4H, m), 7.38-7.57 (5H, m), 11.0 (1H, brs);  $^{13}\text{C}$  NMR ( $\text{CDCl}_3$ )  $\delta$  22.98, 25.73, 29.19, 47.34, 49.19, 50.50, 66.94, 80.32, 102.69, 114.92, 115.13, 128.66, 128.74, 128.90, 128.99, 139.47, 141.33, 141.36, 144.44, 150.86, 160.73, 160.83, 163.19, 163.23, 163.29; Anal. Calcd for  $\text{C}_{24}\text{H}_{25}\text{F}_2\text{N}_3\text{O}_5\text{S}$ : C, 57.02; H, 4.98; N, 8.31. Found: C, 57.11; H, 4.86; N, 8.31;  $[\alpha]_D^{25} = 14.20$  ( $c$  0.38,  $\text{CHCl}_3$ )

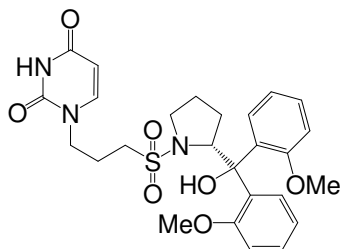

**(R)-1-(3-(2-(Hydroxybis(2-methoxyphenyl)methyl)pyrrolidin-1-ylsulfonyl)propyl)pyrimidine-2,4(1H,3H)-dione (16e)**

Compound **16e** (345 mg, 71%, a colorless solid) was synthesized from **15c** (400 mg, 0.91 mmol) according to the procedure described for Method H.  $^1\text{H}$  NMR ( $\text{DMSO}-d_6$ )  $\delta$  1.57-1.68 (2H, m), 1.85-1.96 (2H, m), 2.82-2.88 (2H, m), 2.93-2.99 (2H, m), 3.33-3.37 (2H, m), 3.70-3.80 (8H, m), 5.54 (1H, d,  $J = 7.8$  Hz), 5.60 (1H, s), 6.75-6.78 (2H, m), 6.84-6.90 (2H, m), 7.01-7.08 (3H, m), 7.23-7.29 (2H, m), 7.59 (1H, d,  $J = 7.8$  Hz), 11.24 (1H, brs);  $^{13}\text{C}$  NMR ( $\text{CDCl}_3$ )  $\delta$  23.30, 24.24, 39.02, 42.84, 47.11, 48.93, 51.24, 55.60, 102.45, 110.74, 120.67, 126.10, 128.62, 129.79, 144.75, 150.78, 157.14, 163.34; Anal. Calcd for  $\text{C}_{26}\text{H}_{31}\text{N}_3\text{O}_7\text{S}$ : C, 58.96; H, 5.90; N, 7.93. Found: C, 58.96; H, 5.82; N, 7.86;  $[\alpha]_D^{25} = 0.39$  ( $c$  1.01,  $\text{CHCl}_3$ )

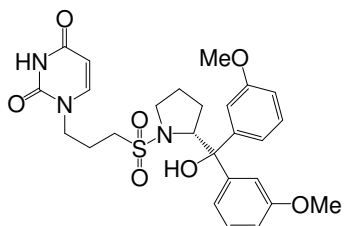

**(R)-1-(3-(2-(Hydroxybis(3-methoxyphenyl)methyl)pyrrolidin-1-ylsulfonyl)propyl)pyrimidine-2,4(1H,3H)-dione (16f)**

Compound **16f** (89 mg, 73%, a colorless foam) was synthesized from **15d** (100 mg, 0.23 mmol) according to the procedure described for Method H.  $^1\text{H}$  NMR ( $\text{CDCl}_3$ )  $\delta$  1.55-1.62 (1H, m), 1.70-1.78 (1H, m), 1.92-2.02 (3H, m), 2.15-2.19 (1H, m), 2.30-2.37 (1H, m), 2.45-2.52 (1H, m), 2.90 (1H, s), 3.04-3.10 (1H, m), 3.65-3.75 (3H, m), 3.78 (3H, s), 3.79 (3H, s), 5.28-5.31 (1H, m), 5.69-5.71 (1H, dd,  $J = 2.4, 8.0$  Hz), 6.77-6.79 (2H, m), 6.99 (1H, d,  $J = 8.0$  Hz), 7.04 (1H, t,  $J = 2.0$  Hz), 7.11-7.13 (2H, m), 7.18-7.26 (3H, m), 8.12 (1H, brs);  $^{13}\text{C}$  NMR ( $\text{CDCl}_3$ )  $\delta$  23.04, 26.15, 29.15, 47.21, 49.70, 50.84, 55.27, 55.34, 67.14, 81.06, 102.49, 112.13, 112.61, 113.04, 118.89, 119.20, 129.17, 129.22, 144.52, 145.69, 147.33, 150.58, 159.39, 159.49, 163.06; Anal. Calcd for  $\text{C}_{26}\text{H}_{31}\text{N}_3\text{O}_7\text{S} \cdot 0.2\text{H}_2\text{O}$ : C, 58.57; H, 5.94; N, 7.88. Found: C, 58.49; H, 6.06; N, 7.65;  $[\alpha]_D^{25} = -26.22$  ( $c$  0.45,  $\text{CHCl}_3$ )



# HPLC analysis chart of 11i

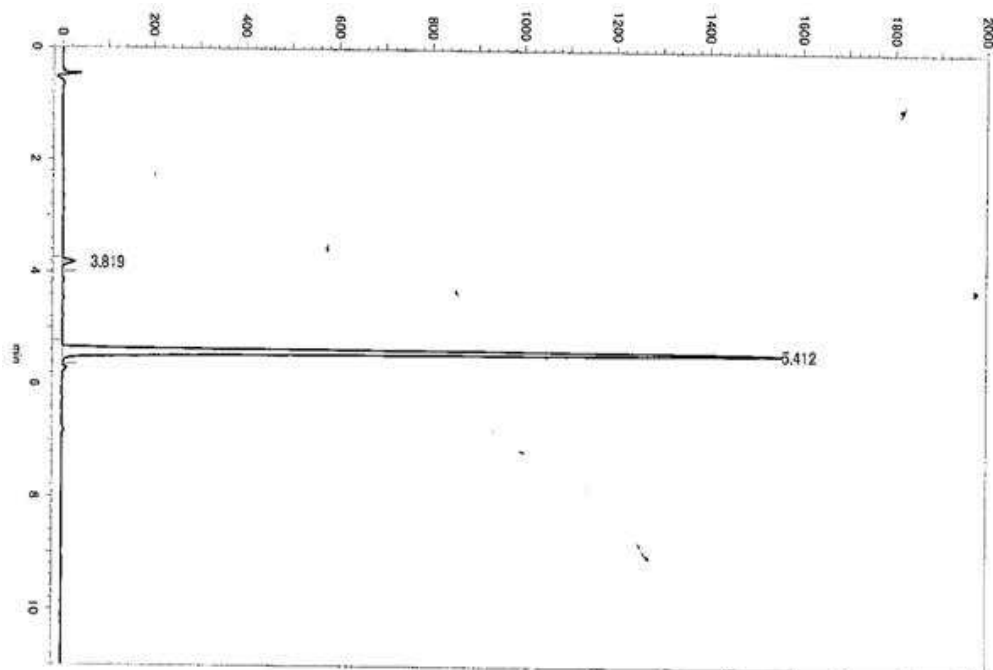

| Peak number | Retention time | Area    | Area%  |
|-------------|----------------|---------|--------|
| 1           | 3.819          | 117982  | 1.46   |
| 2           | 5.412          | 7942060 | 98.54  |
| Total       |                | 8060043 | 100.00 |

Column: Shim-pack XR-ODS 3 mmID X 50mm, 2.2um  
 Column Temp. : 40  
 Mobile phase : 10mM PB(pH6.5) /Acetonitrile 0 min : [90:10] 8min : [20:80] 10min : [20:80]  
 Flow rate : 0.8 mL/min

## HPLC analysis chart of 11r

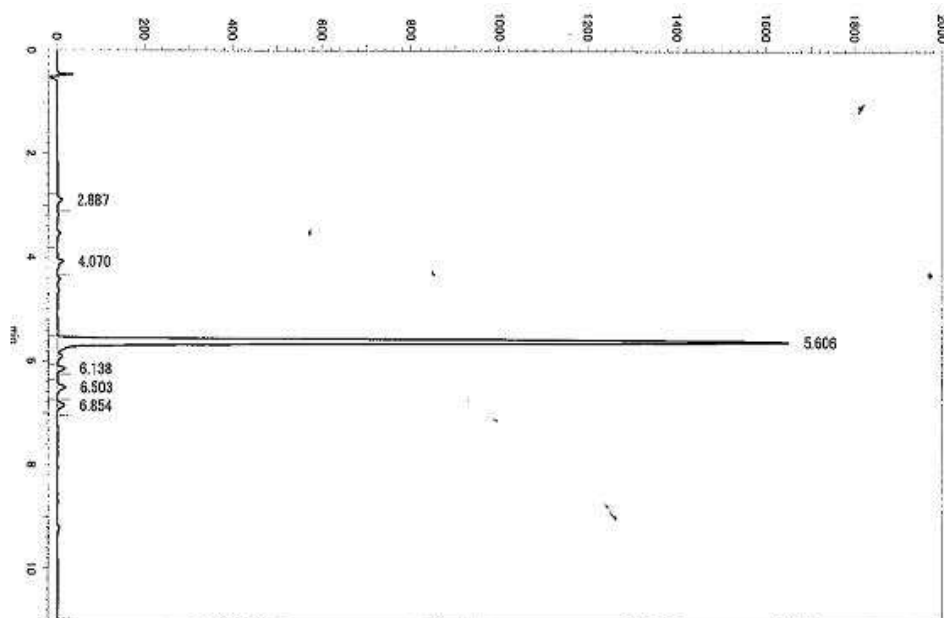

| Peak number | Retention time | Area    | Area%  |
|-------------|----------------|---------|--------|
| 1           | 2.887          | 60149   | 0.65   |
| 2           | 4.070          | 87299   | 0.94   |
| 3           | 5.606          | 8842679 | 95.34  |
| 4           | 6.138          | 77735   | 0.84   |
| 5           | 6.503          | 108347  | 1.17   |
| 6           | 6.854          | 99073   | 1.07   |
| Total       |                | 9275281 | 100.00 |

Column: Shim-pack XR-ODS 3 mmID X 50mm, 2.2um  
 Column Temp.: 40  
 Mobile phase: 10mM PB(pH6.5) /Acetonitrile 0 min : [90:10] 8min : [20:80] 10min : [20:80]  
 Flow rate: 0.8 mL/min

## $^1\text{H}$ -NMR spectrum of 11s in $\text{DMSO}-d_6$ at 25 °C and 80 °C.

**Figure S1**  $^1\text{H}$ -NMR spectrum of 11s in  $\text{DMSO}-d_6$  at 25 °C and 80 °C. Arrows represents exchanged  $^1\text{H}$  peaks between 25 °C and 80 °C

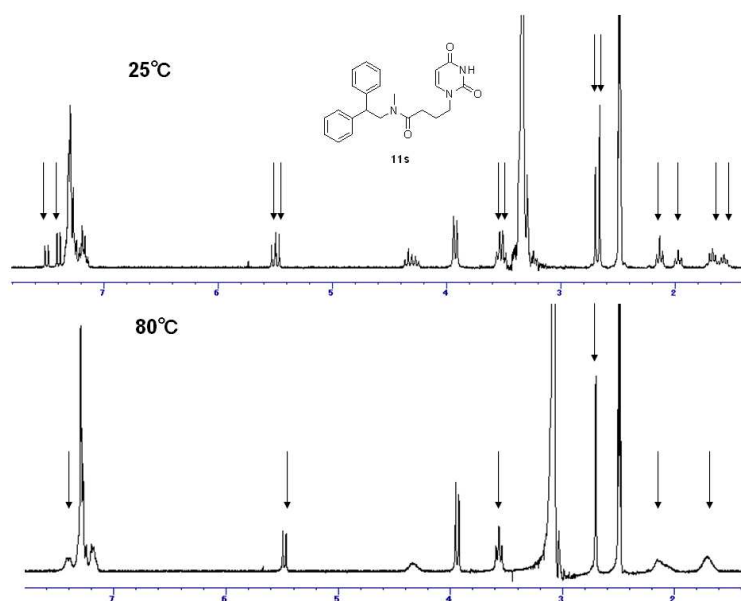

The <sup>1</sup>H-NMR spectrum of **11s** in DMSO-*d*<sub>6</sub> revealed that **11s** exists as mixture of two conformational isomers at 25 °C, and undergoes interconversion between the two conformers at 80 °C.

## Cloning, expression and purification of recombinant human dUTPase

The cDNA of human dUTPase was subcloned into the expression vector pET19b. The construct was then transformed into *E. coli* BL21(DE3) cells (Novagen) in Luria broth at 37 °C. Protein expression was induced with 0.01 mM isopropyl-β-D-thiogalactopyranoside (IPTG) at an optical density of 0.6 at 595 nm. The cell pellet was resuspended in ice-cold lysis buffer containing 50 mM Tris-HCl pH 7.5, 150 mM NaCl and 1 mM dithiothreitol (DTT). After sonication, the disrupted debris was removed by centrifugation. The supernatant was applied to Ni-NTA affinity gels and the 6×His-Tag was removed by digestion with enterokinase in 50 mM Tris-HCl pH 7.5, 150 mM NaCl, 1 mM DTT for 12 hours. The protein solutions used for crystallization were gelfiltrated in a buffer containing 50 mM Tris-HCl pH 7.5, 50 mM NaCl, and 1 mM DTT, on a preparative grade Superdex75 column (GE Healthcare Life Sciences).

## Statistics for X-ray data processing and structure refinement for complex dUTPase:compound 16a (PDB code: 3ARA)

**Table S1** Statistics for X-ray data processing and structure refinement (PDB code: 3ARA)

| <i>Crystal data</i>                |                                 |
|------------------------------------|---------------------------------|
| $P2_12_12_1$ cell dimensions (Å)   | a = 81.89, b = 83.26, c = 89.66 |
| Resolution range (Å)               | 100.00 - 1.70 (1.76 - 1.70)     |
| No. observed reflections           | 344252                          |
| No. unique reflections             | 66325                           |
| Completeness of data (%)           | 97.5 (99.5)                     |
| $R_{\text{sym}}^a$                 | 0.048 (0.210)                   |
| $I/\sigma I$                       | 11.6 (2.6)                      |
| <i>Refinement statistics</i>       |                                 |
| $R_{\text{cryst}}(\%)^b$           | 21.5                            |
| $R_{\text{free}}(\%)^c$            | 24.0                            |
| Rmsd. bonds (Å) <sup>d</sup>       | 0.029                           |
| Rmsd. angles (°) <sup>d</sup>      | 2.256                           |
| Nonhydrogen atoms                  | 3410                            |
| Water molecules                    | 387                             |
| Average B-factor (Å <sup>2</sup> ) | 23.16                           |

<sup>a</sup>  $R_{\text{sym}} = \sum \sum_j |I_j - \langle I \rangle| / \sum I$ , where  $I_j$  is the recorded intensity of the  $j$ th reflection and  $\langle I \rangle$  is the average intensity over multiple recordings.

<sup>b</sup>  $R_{\text{cryst}} = \sum_h \|F_o(h) - F_c(h)\| / \sum_h |F(h)|$ , where  $F_o(h)$  and  $F_c(h)$  are observed and calculated structure factors.

<sup>c</sup>  $R_{\text{free}}$  values are calculated for a randomly selected 5% of the data.

<sup>d</sup> Root mean square deviation from ideal/target geometries.

### Crystallization and Data Collection

The protein solution prepared for co-crystallization contained 20 mg/ml dUTPase, 0.1mM Uracil derivative and 10 mM MgCl<sub>2</sub>. Crystallization experiments were carried out by the hanging-drop vapor diffusion method. Crystals were obtained at 25 °C from the reservoir solution consisting of 15%~20% PEG 4000, 50mM Tris–HCl pH 7.5, 15% (v/v) glycerol and 50mM MgCl<sub>2</sub>. Data sets were collected from a cryo-cooled (100 K) crystal at Pharmaceutical Industry Beamline BL32B2 of Spring-8 Synchrotron in Harima, Japan, using a RAXIS V (Rigaku Corporation) imaging plate (IP) area detector. The data, extending to 1.7 Å, were integrated and scaled by using the CrystalClear software package (Rigaku Corporation)( Table 1).

### Structure determination and refinement

The structure of the dUTPase:compound **16a** complex was solved by molecular replacement using the program AMoRe<sup>9</sup> from the CCP4 suite.<sup>10</sup> The search model was based upon human dUTPase structure (PDB ID code: 1Q5U).<sup>11</sup> The structure of the dUTPase:compound **16a** complex was refined using REFMAC5.<sup>12</sup> Manual rebuilding of the models and electron density map interpretation were carried out using Turbo-Frodo.<sup>13</sup> The final model has  $R$  values of  $R_{\text{cryst}} = 21.5\%$   $R_{\text{free}} = 24.0\%$ . A summary of statistics from the data collection and refinement is given in Table 1.

### Docking study of **16b** on the X-ray structure of human dUTPase and **16a**

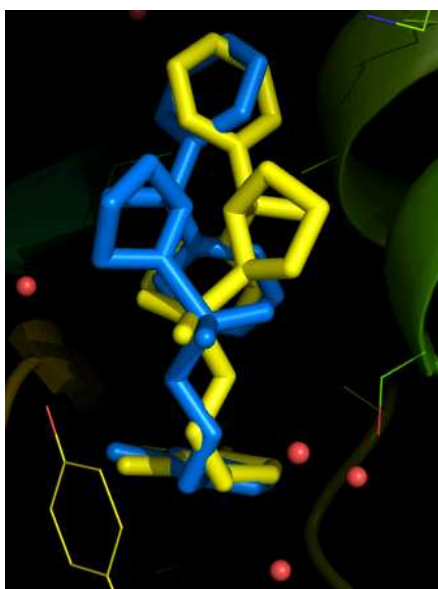

**Figure S2** X ray structure of **16a** (blue stick) and Docking model of **16b** (yellow stick) binding in the catalytic site of dUTPase

We build binding model of **16b** in the active site of human dUTPase on the basis of the X-ray diffraction data of **16a**, on the premise that stacking interaction between uracil ring and phenyl ring are essential for dUTPase inhibition activity. First, possible conformations of free **16b** were generated exhaustively with OMEGA.<sup>14</sup> Next, best aligned conformation of **16b** to the binding conformation of **16a**, which was extracted from the X-ray structure, was selected with ROCS.<sup>15</sup> For the alignment, two pharmacophores, which are uracil ring and terminal phenyl ring, were used as constraints. Finally, best aligned conformation of **16b** was superposed to the active site of X-ray structure of **16a** and the energy minimization was performed in the active site to afford the binding model of **16b**. Contrary to human dUTPase inhibition activity data, the contact surface area of **16b** with human dUTPase was proved to be larger than that of **16a** which meant **16b** had more potent

inhibition activity (**16a**: 565.5Å<sup>2</sup>, **16b**: 590.9Å<sup>2</sup>). This results obviously indicated difficulty to explain the difference of the inhibition activity by the factor of contact surface area.

## References

1. Mathre, D. J.; Jones, T. K.; Xavier, L. C.; Blacklock, T. J.; Reamer, R. A.; Mohan, J. J.; Jones, T. T.; Hoogsteen, K.; Baum, M. W.; Grabowski, E. J. J. A practical enantioselective synthesis of  $\alpha,\alpha$ -Diaryl-2-pyrrolidinemethanol. Preparation and chemistry of the corresponding Oxazaborolidine. *J. Org. Chem.* **1991**, *56*, 751-762.
2. Keuser, C.; Pindur, U. Oligopyrrole carboxamides linked with a nucleobase as potential DNA minor groove binding ligands: synthesis, DNA binding and biological evaluation. *Pharmazie* **2006**, *61*, 261-268.
3. Jirgensons, A.; Kauss, V.; Kalvinsh, I.; Gold, M. R. A practical synthesis of tert-alkylamines via the Ritter reaction with Chloroacetonitrile. *Synthesis* **2002**, *12*, 1709-1712.
4. Kissman, H. M.; Tarbell, D. S.; Williams, J. 2,2-Diphenyl-3,3-dimethylethylenimine and related compounds. *J. Am. Chem. Soc.* **1953**, *75*, 2959-2962.
5. Klumpp, D. A.; Sanchez, G. V., Jr.; Aguirre, S. L.; Zhang, Y.; de Leon, S. Chemistry of dicationic electrophiles: superacid-catalyzed reactions of amino acetals. *J. Org. Chem.* **2002**, *67*, 5028-5031.
6. Kamal, A.; Chouhan, G. Chemoenzymatic synthesis of calcilytic agent NPS-2143 employing a lipase-mediated resolution protocol. *Tetrahedron Asymmetry* **2005**, *16*, 2784-2789.
7. Buchowlecki, W.; Grosman-Zjawiona, Z.; Zjawiony, J. 1-Diphenylphosphinyl-2,2-dimethylaziridine - a new precursor of  $\alpha,\alpha$ -Dimethylarylalkylamines. *Tetrahedron lett.* **1985**, *26*, 1245-1248.
8. Sugiyama, S.; Aoki, Y.; Ishii, K. Enantioselective addition of diethylzinc to aldehydes catalyzed by monosubstituted [2.2]paracyclophane-based N,O-ligands: remarkable cooperative effects of planar and central chiralities. *Tetrahedron Asymmetry* **2006**, *17*, 2847-2856.
9. Navaza, J. AMoRe: an automated package for molecular replacement. *Acta Crystallogr.* **1994**, *A50*, 157-163.
10. The CCP4 suite: programs for protein crystallography. *Acta Crystallogr.* **1994**, *D50*, 760-763.
11. Mol, C. D.; Harris, J. M.; McIntosh, E. M.; Tainer, J. A. Human dUTP pyrophosphatase: uracil recognition by a beta hairpin and active sites formed by three separate subunits. *Structure* **1996**, *4*, 1077-1092.
12. Murshudov, G. N.; Vagin, A. A.; Dodson, E. J. Refinement of macromolecular structures by the maximum-likelihood method. *Acta Crystallogr.* **1997**, *D53*, 240-255.
13. Roussel, A.; Cambillau, C. in *Silicon Graphics Geometry Partner Directory (Silicon Graphics*

*Staff, ed.), Silicon Graphics, Mountain View, CA* **1989**, 77-78.

14. *OMEGA*; OpenEye Scientific Software: Santa Fe, N.

15. Rush, T. S., 3rd; Grant, J. A.; Mosyak, L.; Nicholls, A. A shape-based 3-D scaffold hopping method and its application to a bacterial protein-protein interaction. *J. Med. Chem.* **2005**, *48*, 1489-95.
